# Supplementary material for: A theoretical study of the copper(i)-catalyzed 1,3-dipolar cycloaddition reaction in dabco-based ionic liquids: the anion effect on regioselectivity
Source: Royal Society of Chemistry journal article supplement (doi:10.1039/b921204c), 2010-01-01
Supplement: b921204c.pdf [file b921204c.pdf]

## **A Theoretical Study of the Copper(I)-Catalyzed 1,3-Dipolar Cycloaddition Reaction in Dabco-Based Ionic Liquids: the Anion Effect on Regioselectivity**

Cinzia Chiappe,<sup>a</sup> Benedetta Mennucci,<sup>a</sup> Christian Silvio Pomelli,<sup>a\*</sup> Angelo Sanzone,<sup>a</sup> Alberto  
Marra<sup>b</sup>

<sup>a</sup>Dipartimento di Chimica e Chimica Industriale, via Risorgimento 35, 56126 Pisa, Italy.

<sup>b</sup>Dipartimento di Chimica, Laboratorio di Chimica Organica, via L. Borsari 46, 44100 Ferrara, Italy.

### **SUPPLEMENTAR INFORMATION**

- Stabilization energies of some complexes p.2
- Fully optimized atomic coordinates for all the systems considered in the paper p.3

| complex                                           | $\Delta E$ Kcal/mol |
|---------------------------------------------------|---------------------|
| Cu+C <sub>4</sub> DABCO+Br                        | -114.39             |
| Cu+C <sub>4</sub> DABCO+2Br                       | -166.85             |
| 4Cu+4Br (cubic)                                   | -722.39             |
| 4Cu+4Br(square)                                   | -867.97             |
| 4Cu+6Br(chair)                                    | -930.08             |
| Cu+C <sub>4</sub> DABCO+N(CN) <sub>2</sub> (C)    | 33.32               |
| Cu+C <sub>4</sub> DABCO+N(CN) <sub>2</sub> (T)    | 23.72               |
| Cu+C <sub>4</sub> DABCO+2N(CN) <sub>2</sub> (T)   | -65.26              |
| Cu+C <sub>4</sub> DABCO+2N(CN) <sub>2</sub> (T+C) | -61.87              |

Standard orientation:

| Center<br>Number | Atomic<br>Number | Atomic<br>Type | Coordinates (Angstroms) |           |           |
|------------------|------------------|----------------|-------------------------|-----------|-----------|
|                  |                  |                | X                       | Y         | Z         |
| -----            |                  |                |                         |           |           |
| Cu+Br            |                  |                |                         |           |           |
| 1                | 6                | 0              | 0.000000                | 0.000000  | -3.253349 |
| 2                | 6                | 0              | 0.000000                | 0.000000  | -2.007807 |
| 3                | 6                | 0              | 0.000000                | 0.000000  | -4.730332 |
| 4                | 1                | 0              | 0.000000                | 1.024123  | -5.136179 |
| 5                | 1                | 0              | 0.886917                | -0.512062 | -5.136179 |
| 6                | 1                | 0              | -0.886917               | -0.512062 | -5.136179 |
| 7                | 29               | 0              | 0.000000                | 0.000000  | -0.127018 |
| 8                | 35               | 0              | 0.000000                | 0.000000  | 2.258314  |
| Cu+2N (CN) 2C    |                  |                |                         |           |           |
| 1                | 6                | 0              | 3.537162                | -0.000209 | -0.001353 |
| 2                | 6                | 0              | 2.287458                | -0.000163 | -0.001403 |
| 3                | 6                | 0              | 5.014827                | -0.000232 | -0.000150 |
| 4                | 1                | 0              | 5.421448                | -0.016304 | 1.025540  |
| 5                | 1                | 0              | 5.426619                | -0.879710 | -0.524588 |
| 6                | 1                | 0              | 5.426755                | 0.895145  | -0.496857 |
| 7                | 29               | 0              | 0.368178                | -0.000051 | -0.000808 |
| 8                | 7                | 0              | -1.011441               | -1.664283 | -0.000159 |
| 9                | 6                | 0              | -1.356269               | -2.221723 | -1.162250 |
| 10               | 6                | 0              | -1.354200               | -2.222312 | 1.162270  |
| 11               | 7                | 0              | -1.620363               | -2.659190 | -2.245065 |
| 12               | 7                | 0              | -1.616388               | -2.660325 | 2.245324  |
| 13               | 7                | 0              | -1.011186               | 1.664403  | 0.000550  |
| 14               | 6                | 0              | -1.355187               | 2.223010  | -1.161227 |
| 15               | 6                | 0              | -1.354596               | 2.221375  | 1.163293  |
| 16               | 7                | 0              | -1.618530               | 2.661557  | -2.243788 |
| 17               | 7                | 0              | -1.617400               | 2.658393  | 2.246600  |
| Cu+2N (CN) 2T    |                  |                |                         |           |           |
| 1                | 6                | 0              | 0.214171                | 3.837493  | 0.008669  |
| 2                | 6                | 0              | 0.146568                | 2.589494  | -0.027069 |
| 3                | 6                | 0              | 0.285056                | 5.312977  | 0.074717  |
| 4                | 1                | 0              | 0.304036                | 5.672549  | 1.118257  |
| 5                | 1                | 0              | 1.191816                | 5.706098  | -0.416219 |
| 6                | 1                | 0              | -0.580332               | 5.790419  | -0.414962 |
| 7                | 29               | 0              | 0.034472                | 0.667368  | -0.046181 |
| 8                | 7                | 0              | -1.685546               | -0.491221 | -0.041353 |
| 9                | 6                | 0              | -2.676184               | -1.161956 | -0.038079 |
| 10               | 7                | 0              | -3.667692               | -2.007426 | -0.072077 |
| 11               | 6                | 0              | -4.965887               | -1.889579 | 0.055151  |
| 12               | 7                | 0              | -6.163483               | -1.926172 | 0.154356  |
| 13               | 7                | 0              | 1.511097                | -0.744083 | -0.067187 |
| 14               | 6                | 0              | 2.499307                | -1.415492 | -0.041989 |
| 15               | 7                | 0              | 3.490043                | -2.262068 | -0.038014 |
| 16               | 6                | 0              | 4.790852                | -2.142886 | 0.055708  |
| 17               | 7                | 0              | 5.990080                | -2.183749 | 0.139922  |
| Cu+N (CN) 2C     |                  |                |                         |           |           |
| 1                | 6                | 0              | 3.309395                | -0.000047 | 0.000159  |

|                |    |   |           |           |           |
|----------------|----|---|-----------|-----------|-----------|
| 2              | 6  | 0 | 2.065453  | -0.000108 | -0.000391 |
| 3              | 6  | 0 | 4.785537  | 0.000063  | 0.001077  |
| 4              | 1  | 0 | 5.188842  | -0.054032 | 1.023935  |
| 5              | 1  | 0 | 5.189315  | -0.858516 | -0.557143 |
| 6              | 1  | 0 | 5.189031  | 0.912937  | -0.463315 |
| 7              | 29 | 0 | 0.197203  | -0.000080 | -0.000718 |
| 8              | 7  | 0 | -1.743371 | 0.000025  | -0.000981 |
| 9              | 6  | 0 | -2.411226 | -1.166758 | 0.000228  |
| 10             | 6  | 0 | -2.411070 | 1.166898  | 0.000220  |
| 11             | 7  | 0 | -2.936651 | -2.236748 | 0.001174  |
| 12             | 7  | 0 | -2.936348 | 2.236960  | 0.001177  |
| Cu+N (CN) 2T   |    |   |           |           |           |
| 1              | 6  | 0 | -3.910730 | 0.171320  | 0.001495  |
| 2              | 6  | 0 | -2.671872 | 0.053706  | 0.000017  |
| 3              | 29 | 0 | -0.811453 | -0.122078 | -0.002693 |
| 4              | 6  | 0 | -5.380396 | 0.313707  | 0.004208  |
| 5              | 1  | 0 | -5.876506 | -0.605721 | -0.345517 |
| 6              | 1  | 0 | -5.763296 | 0.530009  | 1.014139  |
| 7              | 1  | 0 | -5.707833 | 1.134023  | -0.654219 |
| 8              | 7  | 0 | 1.049512  | -0.293089 | -0.005049 |
| 9              | 6  | 0 | 2.245879  | -0.324959 | -0.000175 |
| 10             | 7  | 0 | 3.514925  | -0.508917 | 0.008575  |
| 11             | 6  | 0 | 4.602171  | 0.221398  | 0.002533  |
| 12             | 7  | 0 | 5.659773  | 0.783563  | -0.001350 |
| Cu+N (CN) 2C+T |    |   |           |           |           |
| 1              | 6  | 0 | -2.897744 | -2.446164 | 0.012411  |
| 2              | 6  | 0 | -1.920499 | -1.668146 | -0.006687 |
| 3              | 6  | 0 | -4.086838 | -3.322741 | 0.039985  |
| 4              | 1  | 0 | -4.255340 | -3.814750 | -0.932787 |
| 5              | 1  | 0 | -3.991582 | -4.121251 | 0.795349  |
| 6              | 1  | 0 | -5.002476 | -2.756686 | 0.279834  |
| 7              | 29 | 0 | -0.409040 | -0.512871 | -0.025355 |
| 8              | 7  | 0 | -1.193580 | 1.909242  | 0.014988  |
| 9              | 6  | 0 | -1.400500 | 2.459709  | 1.197983  |
| 10             | 7  | 0 | -1.546654 | 2.869163  | 2.339682  |
| 11             | 7  | 0 | 1.490930  | -0.117237 | -0.064728 |
| 12             | 6  | 0 | 2.678977  | -0.070122 | -0.051446 |
| 13             | 7  | 0 | 3.961524  | 0.113766  | -0.062282 |
| 14             | 6  | 0 | 5.010635  | -0.664694 | 0.013693  |
| 15             | 7  | 0 | 6.045979  | -1.255280 | 0.073862  |
| 16             | 6  | 0 | -1.464694 | 2.477558  | -1.144223 |
| 17             | 7  | 0 | -1.673122 | 2.905140  | -2.269722 |
| Cu+2Br         |    |   |           |           |           |
| 1              | 29 | 0 | -0.288579 | -0.000150 | -0.000319 |
| 2              | 35 | 0 | 1.265198  | 2.191521  | 0.000132  |
| 3              | 35 | 0 | 1.265650  | -2.191248 | 0.000131  |
| 4              | 6  | 0 | -2.230973 | -0.000184 | -0.000635 |
| 5              | 6  | 0 | -3.484770 | -0.000214 | -0.000687 |
| 6              | 6  | 0 | -4.963315 | -0.000333 | 0.000409  |
| 7              | 1  | 0 | -5.380293 | -0.913906 | -0.462218 |
| 8              | 1  | 0 | -5.380382 | 0.858756  | -0.556840 |
| 9              | 1  | 0 | -5.375884 | 0.054341  | 1.024558  |
| 2CuBr          |    |   |           |           |           |
| 1              | 6  | 0 | 0.006693  | 2.927933  | 0.001083  |

Supplementary Material for PCCP  
 This journal is © The Owner Societies 2010

|                |    |   |           |           |           |
|----------------|----|---|-----------|-----------|-----------|
| 2              | 6  | 0 | -0.000154 | 1.681484  | 0.001083  |
| 3              | 6  | 0 | 0.011448  | 4.399912  | -0.001146 |
| 4              | 1  | 0 | 0.325125  | 4.803640  | 0.971596  |
| 5              | 1  | 0 | 0.693031  | 4.793502  | -0.768215 |
| 6              | 1  | 0 | -0.993133 | 4.789960  | -0.217852 |
| 7              | 29 | 0 | 1.314247  | 0.243566  | 0.000836  |
| 8              | 29 | 0 | -1.314496 | 0.244879  | 0.000832  |
| 9              | 35 | 0 | 3.191058  | -1.182985 | -0.000572 |
| 10             | 35 | 0 | -3.194650 | -1.177243 | -0.000572 |
| 2CuN (CN) 2C   |    |   |           |           |           |
| 1              | 29 | 0 | -1.517784 | 0.253485  | -0.092885 |
| 2              | 6  | 0 | -0.024914 | 1.456765  | -0.289158 |
| 3              | 6  | 0 | -0.087360 | 2.699784  | -0.429365 |
| 4              | 29 | 0 | 1.544948  | 0.370950  | -0.068984 |
| 5              | 6  | 0 | -0.161153 | 4.160701  | -0.594356 |
| 6              | 1  | 0 | -1.144907 | 4.453691  | -0.984993 |
| 7              | 7  | 0 | 3.165775  | -0.648335 | 0.190578  |
| 8              | 6  | 0 | 3.719337  | -1.301095 | -0.854169 |
| 9              | 6  | 0 | 3.601355  | -0.892320 | 1.443252  |
| 10             | 7  | 0 | 4.175654  | -1.813036 | -1.824681 |
| 11             | 7  | 0 | 3.948494  | -1.033820 | 2.575249  |
| 12             | 7  | 0 | -3.012080 | -0.962968 | 0.129221  |
| 13             | 6  | 0 | -3.188502 | -2.026496 | -0.686487 |
| 14             | 6  | 0 | -4.010880 | -0.564384 | 0.939001  |
| 15             | 7  | 0 | -3.343981 | -2.963780 | -1.405376 |
| 16             | 7  | 0 | -4.836836 | -0.143241 | 1.686047  |
| 17             | 1  | 0 | 0.595932  | 4.512670  | -1.309092 |
| 18             | 1  | 0 | -0.005253 | 4.683578  | 0.358705  |
| 2CuN (CN) 2T   |    |   |           |           |           |
| 1              | 29 | 0 | 1.328240  | 0.725948  | -0.064477 |
| 2              | 6  | 0 | 0.044441  | 2.173912  | -0.009760 |
| 3              | 6  | 0 | 0.379909  | 3.362213  | 0.188089  |
| 4              | 6  | 0 | 0.761798  | 4.763141  | 0.430319  |
| 5              | 1  | 0 | 0.159672  | 5.199509  | 1.238681  |
| 6              | 29 | 0 | -1.466608 | 1.015244  | -0.130128 |
| 7              | 7  | 0 | -2.936067 | -0.111952 | -0.242292 |
| 8              | 6  | 0 | -3.844612 | -0.893823 | -0.248793 |
| 9              | 7  | 0 | -4.855583 | -1.655304 | -0.385995 |
| 10             | 6  | 0 | -5.420407 | -2.665568 | 0.230539  |
| 11             | 7  | 0 | -6.019600 | -3.586343 | 0.701917  |
| 12             | 7  | 0 | 2.560828  | -0.666199 | -0.106368 |
| 13             | 6  | 0 | 3.394561  | -1.526297 | -0.083631 |
| 14             | 7  | 0 | 4.168494  | -2.546048 | -0.114574 |
| 15             | 6  | 0 | 5.462518  | -2.715136 | 0.083756  |
| 16             | 7  | 0 | 6.615618  | -2.990211 | 0.232496  |
| 17             | 1  | 0 | 1.815438  | 4.826690  | 0.733684  |
| 18             | 1  | 0 | 0.632478  | 5.380986  | -0.468235 |
| 2CuN (CN) 2T+C |    |   |           |           |           |
| 1              | 29 | 0 | -0.866673 | 0.695949  | -0.049746 |
| 2              | 6  | 0 | 0.720236  | 1.782110  | 0.028470  |
| 3              | 6  | 0 | 1.069151  | 2.977778  | 0.068684  |
| 4              | 6  | 0 | 1.467498  | 4.393527  | 0.113547  |
| 5              | 1  | 0 | 2.331228  | 4.579576  | -0.538714 |
| 6              | 29 | 0 | 1.677846  | 0.098107  | 0.014374  |
| 7              | 7  | 0 | -2.529464 | -0.124256 | -0.144993 |

|    |   |   |           |           |           |
|----|---|---|-----------|-----------|-----------|
| 8  | 6 | 0 | -3.620904 | -0.620652 | -0.142297 |
| 9  | 7 | 0 | -4.721076 | -1.254187 | -0.194646 |
| 10 | 6 | 0 | -5.995457 | -1.079077 | 0.046386  |
| 11 | 7 | 0 | -7.175495 | -1.025196 | 0.232016  |
| 12 | 1 | 0 | 0.646279  | 5.035851  | -0.232310 |
| 13 | 1 | 0 | 1.734732  | 4.704825  | 1.131983  |
| 14 | 7 | 0 | 2.873919  | -1.412267 | 0.019597  |
| 15 | 6 | 0 | 3.236911  | -1.976285 | 1.187476  |
| 16 | 6 | 0 | 3.379683  | -1.864304 | -1.143953 |
| 17 | 7 | 0 | 3.511329  | -2.417114 | 2.258709  |
| 18 | 7 | 0 | 3.786651  | -2.199331 | -2.211405 |

Path 1,4

I3

CuBr

|    |    |   |           |           |           |
|----|----|---|-----------|-----------|-----------|
| 1  | 29 | 0 | 0.018213  | -0.544269 | -0.003477 |
| 2  | 35 | 0 | 2.461910  | -0.746116 | 0.012483  |
| 3  | 7  | 0 | -0.107177 | 1.731795  | 0.029057  |
| 4  | 7  | 0 | -1.251028 | 2.288051  | 0.031497  |
| 5  | 6  | 0 | 1.091766  | 2.614894  | -0.068772 |
| 6  | 7  | 0 | -2.415007 | 2.475818  | 0.047022  |
| 7  | 6  | 0 | -1.835776 | -0.988171 | -0.042120 |
| 8  | 6  | 0 | -3.055391 | -1.250083 | -0.044070 |
| 9  | 6  | 0 | -4.499095 | -1.556085 | 0.008197  |
| 10 | 1  | 0 | -4.802732 | -1.902315 | 1.018712  |
| 11 | 1  | 0 | -4.770572 | -2.356355 | -0.711962 |
| 12 | 1  | 0 | -5.111562 | -0.663568 | -0.238233 |
| 13 | 1  | 0 | 1.944969  | 1.931769  | -0.043462 |
| 14 | 1  | 0 | 1.148839  | 3.314434  | 0.778503  |
| 15 | 1  | 0 | 1.099475  | 3.180926  | -1.012105 |

CuN (CN) 2C

|    |    |   |           |           |           |
|----|----|---|-----------|-----------|-----------|
| 1  | 29 | 0 | 0.039987  | -0.599685 | 0.084174  |
| 2  | 7  | 0 | -1.940786 | -0.662606 | 0.157681  |
| 3  | 6  | 0 | -2.601924 | -1.613045 | -0.523951 |
| 4  | 6  | 0 | -2.600083 | 0.180794  | 0.965758  |
| 5  | 7  | 0 | -3.122460 | -2.471146 | -1.167636 |
| 6  | 7  | 0 | -3.100376 | 0.990584  | 1.685472  |
| 7  | 7  | 0 | 0.109130  | 1.681427  | -0.407034 |
| 8  | 7  | 0 | 1.207450  | 2.291860  | -0.245554 |
| 9  | 6  | 0 | -1.051662 | 2.464916  | -0.925531 |
| 10 | 7  | 0 | 2.323001  | 2.588686  | -0.023333 |
| 11 | 1  | 0 | -0.787777 | 3.029329  | -1.830907 |
| 12 | 6  | 0 | 1.881403  | -1.018497 | 0.133921  |
| 13 | 6  | 0 | 3.104961  | -1.248208 | 0.165196  |
| 14 | 6  | 0 | 4.553439  | -1.534075 | 0.199983  |
| 15 | 1  | 0 | 5.128452  | -0.655845 | 0.530575  |
| 16 | 1  | 0 | 4.931688  | -1.819773 | -0.793624 |
| 17 | 1  | 0 | 4.786029  | -2.359869 | 0.889859  |
| 18 | 1  | 0 | -1.819476 | 1.729131  | -1.165830 |
| 19 | 1  | 0 | -1.447077 | 3.144947  | -0.160533 |

Supplementary Material for PCCP  
 This journal is © The Owner Societies 2010

CuN (CN) 2T

|    |    |   |           |           |           |
|----|----|---|-----------|-----------|-----------|
| 1  | 29 | 0 | 0.357131  | -0.559388 | -0.081379 |
| 2  | 7  | 0 | 0.920275  | 1.769025  | 0.003678  |
| 3  | 7  | 0 | 2.135486  | 2.116323  | 0.079893  |
| 4  | 6  | 0 | -0.117074 | 2.838141  | 0.002030  |
| 5  | 7  | 0 | 3.310542  | 2.137106  | 0.138590  |
| 6  | 1  | 0 | 0.032790  | 3.556314  | -0.816580 |
| 7  | 6  | 0 | 2.092421  | -1.294635 | -0.013652 |
| 8  | 6  | 0 | 3.252562  | -1.745750 | 0.034684  |
| 9  | 6  | 0 | 4.630463  | -2.282198 | 0.090038  |
| 10 | 1  | 0 | 5.360492  | -1.554683 | -0.294517 |
| 11 | 1  | 0 | 4.731326  | -3.199528 | -0.509554 |
| 12 | 1  | 0 | 4.925303  | -2.529621 | 1.120971  |
| 13 | 1  | 0 | -1.062753 | 2.315008  | -0.137394 |
| 14 | 1  | 0 | -0.140020 | 3.375912  | 0.960411  |
| 15 | 7  | 0 | -1.511915 | -0.201932 | -0.159366 |
| 16 | 6  | 0 | -2.707093 | -0.136346 | -0.126359 |
| 17 | 7  | 0 | -3.972781 | 0.081478  | -0.146633 |
| 18 | 6  | 0 | -5.064068 | -0.597636 | 0.100219  |
| 19 | 7  | 0 | -6.128351 | -1.106373 | 0.300252  |

2CuN (CN) 2C

|    |    |   |           |           |           |
|----|----|---|-----------|-----------|-----------|
| 1  | 29 | 0 | 0.923540  | -0.158715 | -0.029154 |
| 2  | 6  | 0 | 0.006832  | 1.557800  | 0.107601  |
| 3  | 6  | 0 | 0.095883  | 2.799163  | 0.212490  |
| 4  | 29 | 0 | -1.604346 | 0.465177  | 0.071299  |
| 5  | 7  | 0 | 2.983772  | 0.527797  | -0.306316 |
| 6  | 7  | 0 | 3.224315  | 1.766516  | -0.170010 |
| 7  | 6  | 0 | 4.141629  | -0.381943 | -0.571099 |
| 8  | 7  | 0 | 3.120684  | 2.924681  | -0.011597 |
| 9  | 1  | 0 | 4.742723  | -0.522734 | 0.335114  |
| 10 | 7  | 0 | 1.345681  | -2.093643 | -0.016726 |
| 11 | 6  | 0 | 0.925406  | -2.909506 | -1.000398 |
| 12 | 6  | 0 | 2.084589  | -2.562673 | 1.002012  |
| 13 | 7  | 0 | 0.537835  | -3.559074 | -1.920084 |
| 14 | 7  | 0 | 2.772154  | -2.866094 | 1.927376  |
| 15 | 7  | 0 | -3.410215 | -0.220023 | 0.067309  |
| 16 | 6  | 0 | -4.189316 | 0.000510  | -1.008329 |
| 17 | 6  | 0 | -3.907816 | -0.841646 | 1.153068  |
| 18 | 7  | 0 | -4.814442 | 0.241276  | -1.992912 |
| 19 | 7  | 0 | -4.278953 | -1.374111 | 2.151141  |
| 20 | 6  | 0 | 0.132850  | 4.266802  | 0.345446  |
| 21 | 1  | 0 | 0.704507  | 4.570235  | 1.231677  |
| 22 | 1  | 0 | -0.885252 | 4.667073  | 0.444992  |
| 23 | 1  | 0 | 0.597720  | 4.735352  | -0.531119 |
| 24 | 1  | 0 | 3.708771  | -1.339473 | -0.858141 |
| 25 | 1  | 0 | 4.768759  | -0.000158 | -1.386739 |

2CuN (CN) 2T

|   |    |   |           |          |           |
|---|----|---|-----------|----------|-----------|
| 1 | 29 | 0 | 1.013158  | 0.350661 | -0.329037 |
| 2 | 6  | 0 | -0.272779 | 1.746112 | -0.876431 |
| 3 | 6  | 0 | -0.167799 | 2.934731 | -1.240468 |
| 4 | 29 | 0 | -1.591284 | 0.390324 | -0.532354 |
| 5 | 6  | 0 | -0.058197 | 4.330452 | -1.698520 |
| 6 | 7  | 0 | 1.857627  | 1.310652 | 1.479156  |
| 7 | 7  | 0 | 1.642799  | 2.536118 | 1.716879  |
| 8 | 6  | 0 | 2.672816  | 0.530471 | 2.458407  |
| 9 | 7  | 0 | 1.308102  | 3.660231 | 1.690799  |

|    |   |   |           |           |           |
|----|---|---|-----------|-----------|-----------|
| 10 | 1 | 0 | 2.166916  | 0.463523  | 3.430362  |
| 11 | 7 | 0 | -3.045944 | -0.723473 | -0.210452 |
| 12 | 6 | 0 | -4.027868 | -1.372387 | 0.016255  |
| 13 | 7 | 0 | -4.998985 | -2.171221 | 0.210640  |
| 14 | 6 | 0 | -6.231570 | -2.154830 | 0.651100  |
| 15 | 7 | 0 | -7.360830 | -2.252406 | 1.032869  |
| 16 | 7 | 0 | 2.160893  | -1.167729 | -0.412501 |
| 17 | 6 | 0 | 2.965668  | -2.047071 | -0.542133 |
| 18 | 7 | 0 | 3.730776  | -3.049331 | -0.747785 |
| 19 | 6 | 0 | 4.944571  | -3.413382 | -0.406428 |
| 20 | 7 | 0 | 6.032648  | -3.840754 | -0.153252 |
| 21 | 1 | 0 | -0.819680 | 4.552815  | -2.458552 |
| 22 | 1 | 0 | -0.184310 | 5.036680  | -0.867856 |
| 23 | 1 | 0 | 0.925080  | 4.516441  | -2.151971 |
| 24 | 1 | 0 | 2.767761  | -0.465346 | 2.025237  |
| 25 | 1 | 0 | 3.671241  | 0.968139  | 2.587981  |

CuN (CN) 2C+T

|    |    |   |           |           |           |
|----|----|---|-----------|-----------|-----------|
| 1  | 29 | 0 | -0.782687 | 0.517733  | 0.185986  |
| 2  | 6  | 0 | 0.616009  | 1.923981  | -0.131405 |
| 3  | 6  | 0 | 0.407920  | 3.138199  | 0.059544  |
| 4  | 7  | 0 | -0.055797 | -0.742228 | 1.863855  |
| 5  | 7  | 0 | 0.832990  | -0.349757 | 2.674312  |
| 6  | 6  | 0 | -0.493880 | -2.176468 | 1.938017  |
| 7  | 7  | 0 | 1.636380  | 0.207268  | 3.322019  |
| 8  | 1  | 0 | -0.835941 | -2.429704 | 2.949967  |
| 9  | 7  | 0 | -2.508360 | -0.246361 | -0.101435 |
| 10 | 6  | 0 | -3.634719 | -0.587485 | -0.332101 |
| 11 | 7  | 0 | -4.808170 | -1.071792 | -0.474509 |
| 12 | 6  | 0 | -5.905869 | -0.790685 | -1.134456 |
| 13 | 7  | 0 | -6.957274 | -0.632862 | -1.682645 |
| 14 | 29 | 0 | 1.729162  | 0.463978  | -0.641877 |
| 15 | 7  | 0 | 2.907685  | -1.019921 | -1.011357 |
| 16 | 6  | 0 | 2.712610  | -2.133032 | -0.286397 |
| 17 | 6  | 0 | 3.889116  | -0.938429 | -1.927433 |
| 18 | 7  | 0 | 2.446442  | -3.060725 | 0.412234  |
| 19 | 7  | 0 | 4.731404  | -0.782713 | -2.753814 |
| 20 | 6  | 0 | 0.161660  | 4.574933  | 0.266209  |
| 21 | 1  | 0 | -0.782940 | 4.885881  | -0.199883 |
| 22 | 1  | 0 | -1.328210 | -2.257397 | 1.240404  |
| 23 | 1  | 0 | 0.322960  | -2.838939 | 1.628686  |
| 24 | 1  | 0 | 0.967262  | 5.170648  | -0.184797 |
| 25 | 1  | 0 | 0.114910  | 4.827440  | 1.333979  |

CuN (CN) 2T+C

|    |    |   |           |           |           |
|----|----|---|-----------|-----------|-----------|
| 1  | 29 | 0 | -1.214855 | -0.184206 | 0.081758  |
| 2  | 6  | 0 | -0.410976 | 1.598102  | 0.153909  |
| 3  | 6  | 0 | -0.612588 | 2.829602  | 0.210722  |
| 4  | 29 | 0 | 1.252029  | 0.598574  | 0.078121  |
| 5  | 7  | 0 | -1.440745 | -2.155042 | 0.099646  |
| 6  | 6  | 0 | -1.712108 | -2.783840 | -1.055566 |
| 7  | 6  | 0 | -1.332830 | -2.834118 | 1.255001  |
| 8  | 7  | 0 | -1.982356 | -3.239690 | -2.123306 |
| 9  | 7  | 0 | -1.244533 | -3.350463 | 2.324824  |
| 10 | 7  | 0 | 3.007504  | -0.016540 | -0.004809 |
| 11 | 6  | 0 | 4.169089  | -0.304180 | -0.069650 |
| 12 | 7  | 0 | 5.363361  | -0.741421 | -0.127164 |
| 13 | 6  | 0 | 6.584114  | -0.283077 | -0.243385 |



Supplementary Material for PCCP  
 This journal is © The Owner Societies 2010

|             |    |   |           |           |           |
|-------------|----|---|-----------|-----------|-----------|
| 14          | 7  | 0 | 7.735139  | 0.026411  | -0.345111 |
| 15          | 6  | 0 | -0.770283 | 4.293136  | 0.293371  |
| 16          | 1  | 0 | -1.197215 | 4.701905  | -0.631077 |
| 17          | 7  | 0 | -3.314762 | 0.321179  | -0.168014 |
| 18          | 7  | 0 | -3.627612 | 1.548422  | -0.269138 |
| 19          | 6  | 0 | -4.416856 | -0.685672 | -0.257687 |
| 20          | 7  | 0 | -3.585970 | 2.720486  | -0.312674 |
| 21          | 1  | 0 | -4.828529 | -0.728148 | -1.273672 |
| 22          | 1  | 0 | -3.962614 | -1.645853 | -0.017505 |
| 23          | 1  | 0 | -5.215523 | -0.466286 | 0.462499  |
| 24          | 1  | 0 | 0.203156  | 4.773699  | 0.461489  |
| 25          | 1  | 0 | -1.432883 | 4.574895  | 1.121713  |
| 2CuBr       |    |   |           |           |           |
| 1           | 29 | 0 | -1.180693 | 0.218484  | -0.036156 |
| 2           | 6  | 0 | -0.064638 | 1.929688  | -0.148190 |
| 3           | 6  | 0 | -0.665949 | 3.008529  | 0.025941  |
| 4           | 6  | 0 | -1.357695 | 4.295687  | 0.210745  |
| 5           | 29 | 0 | 1.410287  | 0.746661  | -0.444374 |
| 6           | 35 | 0 | 3.282132  | -0.682487 | -0.677388 |
| 7           | 35 | 0 | -3.035747 | -1.143273 | -0.816945 |
| 8           | 7  | 0 | -0.348372 | -1.018555 | 1.572398  |
| 9           | 7  | 0 | 0.138189  | -0.557422 | 2.643299  |
| 10          | 6  | 0 | -0.023211 | -2.430655 | 1.189893  |
| 11          | 7  | 0 | 0.481192  | 0.067847  | 3.578017  |
| 12          | 1  | 0 | -0.113955 | -3.107455 | 2.049548  |
| 13          | 1  | 0 | -0.755105 | 5.120378  | -0.196049 |
| 14          | 1  | 0 | -2.325272 | 4.301888  | -0.310617 |
| 15          | 1  | 0 | -1.544574 | 4.507196  | 1.272950  |
| 16          | 1  | 0 | -0.759050 | -2.695303 | 0.427851  |
| 17          | 1  | 0 | 0.988137  | -2.476879 | 0.766998  |
| TS 3-4      |    |   |           |           |           |
| CuBr        |    |   |           |           |           |
| 1           | 29 | 0 | 0.167752  | -0.530472 | -0.000290 |
| 2           | 35 | 0 | 2.621426  | -0.430161 | 0.000187  |
| 3           | 7  | 0 | -0.460075 | 1.465197  | -0.000100 |
| 4           | 7  | 0 | -1.739351 | 1.751470  | 0.000032  |
| 5           | 6  | 0 | 0.455761  | 2.634331  | -0.000010 |
| 6           | 7  | 0 | -2.830367 | 1.237328  | 0.000119  |
| 7           | 6  | 0 | -1.577546 | -1.263681 | -0.000387 |
| 8           | 6  | 0 | -2.827368 | -1.048337 | -0.000048 |
| 9           | 6  | 0 | -4.294822 | -1.251393 | 0.000414  |
| 10          | 1  | 0 | -4.543802 | -2.322055 | 0.000697  |
| 11          | 1  | 0 | -4.754763 | -0.789797 | -0.884235 |
| 12          | 1  | 0 | -4.754236 | -0.789469 | 0.885166  |
| 13          | 1  | 0 | 1.465837  | 2.216162  | -0.000010 |
| 14          | 1  | 0 | 0.322324  | 3.260451  | 0.895441  |
| 15          | 1  | 0 | 0.322353  | 3.260553  | -0.895388 |
| CuN (CN) 2C |    |   |           |           |           |
| 1           | 29 | 0 | 0.169181  | -0.442081 | -0.067365 |
| 2           | 7  | 0 | 2.160329  | -0.433396 | -0.057664 |
| 3           | 6  | 0 | 2.793138  | -1.568151 | 0.287815  |
| 4           | 6  | 0 | 2.864638  | 0.648753  | -0.415433 |
| 5           | 7  | 0 | 3.288689  | -2.603542 | 0.608959  |

|    |   |   |           |           |           |
|----|---|---|-----------|-----------|-----------|
| 6  | 7 | 0 | 3.402986  | 1.662994  | -0.741453 |
| 7  | 7 | 0 | -0.591475 | 1.518438  | 0.206097  |
| 8  | 7 | 0 | -1.894393 | 1.675946  | 0.234767  |
| 9  | 6 | 0 | 0.177719  | 2.773243  | 0.432575  |
| 10 | 7 | 0 | -2.932401 | 1.068651  | 0.143834  |
| 11 | 1 | 0 | 0.070706  | 3.132383  | 1.467308  |
| 12 | 6 | 0 | -1.525332 | -1.250752 | -0.178259 |
| 13 | 6 | 0 | -2.788204 | -1.141283 | -0.168879 |
| 14 | 6 | 0 | -4.232272 | -1.464835 | -0.219243 |
| 15 | 1 | 0 | -4.386546 | -2.543393 | -0.358791 |
| 16 | 1 | 0 | -4.723264 | -0.934681 | -1.046484 |
| 17 | 1 | 0 | -4.733550 | -1.159931 | 0.709206  |
| 18 | 1 | 0 | 1.228113  | 2.548051  | 0.243152  |
| 19 | 1 | 0 | -0.135953 | 3.572442  | -0.254052 |

CuN (CN) 2T

|    |    |   |           |           |           |
|----|----|---|-----------|-----------|-----------|
| 1  | 29 | 0 | 0.266833  | -0.498782 | 0.000076  |
| 2  | 7  | 0 | 1.097898  | 1.440994  | 0.000050  |
| 3  | 7  | 0 | 2.399070  | 1.604553  | -0.000079 |
| 4  | 6  | 0 | 0.298597  | 2.691902  | 0.000143  |
| 5  | 7  | 0 | 3.427156  | 0.971841  | -0.000151 |
| 6  | 1  | 0 | 0.488888  | 3.303627  | -0.894318 |
| 7  | 6  | 0 | 1.937687  | -1.350057 | 0.000210  |
| 8  | 6  | 0 | 3.202585  | -1.254552 | -0.000029 |
| 9  | 6  | 0 | 4.638018  | -1.620873 | -0.000075 |
| 10 | 1  | 0 | 5.145144  | -1.213605 | -0.884995 |
| 11 | 1  | 0 | 4.763429  | -2.712149 | 0.000090  |
| 12 | 1  | 0 | 5.145282  | -1.213308 | 0.884625  |
| 13 | 1  | 0 | -0.748486 | 2.380381  | 0.000083  |
| 14 | 1  | 0 | 0.488866  | 3.303475  | 0.894705  |
| 15 | 7  | 0 | -1.623887 | -0.185420 | -0.000155 |
| 16 | 6  | 0 | -2.813045 | -0.050257 | -0.000137 |
| 17 | 7  | 0 | -4.060676 | 0.255400  | -0.000196 |
| 18 | 6  | 0 | -5.199588 | -0.396118 | -0.000062 |
| 19 | 7  | 0 | -6.297676 | -0.873655 | 0.000145  |

2CuN (CN) 2C

|    |    |   |           |           |           |
|----|----|---|-----------|-----------|-----------|
| 1  | 29 | 0 | -1.004057 | -0.152395 | -0.028017 |
| 2  | 6  | 0 | -0.050295 | 1.523863  | 0.012864  |
| 3  | 6  | 0 | -0.291057 | 2.768010  | 0.030095  |
| 4  | 29 | 0 | 1.525822  | 0.402932  | 0.025667  |
| 5  | 7  | 0 | -2.886207 | 0.634823  | -0.043572 |
| 6  | 7  | 0 | -3.052541 | 1.923546  | -0.017192 |
| 7  | 6  | 0 | -4.123477 | -0.190617 | -0.068595 |
| 8  | 7  | 0 | -2.467093 | 2.970738  | 0.009927  |
| 9  | 1  | 0 | -4.742219 | 0.044603  | -0.944357 |
| 10 | 7  | 0 | -1.347634 | -2.101909 | -0.053449 |
| 11 | 6  | 0 | -1.685261 | -2.719970 | 1.091943  |
| 12 | 6  | 0 | -1.308540 | -2.774989 | -1.217507 |
| 13 | 7  | 0 | -1.995256 | -3.173376 | 2.148994  |
| 14 | 7  | 0 | -1.269026 | -3.286128 | -2.292386 |
| 15 | 7  | 0 | 3.333425  | -0.261733 | 0.056779  |
| 16 | 6  | 0 | 3.911076  | -0.594401 | 1.228062  |
| 17 | 6  | 0 | 4.044602  | -0.312829 | -1.086857 |
| 18 | 7  | 0 | 4.354033  | -0.863429 | 2.299481  |
| 19 | 7  | 0 | 4.608966  | -0.322834 | -2.134753 |
| 20 | 6  | 0 | -0.002678 | 4.222954  | 0.057367  |
| 21 | 1  | 0 | 1.080700  | 4.393207  | 0.074042  |

Supplementary Material for PCCP  
 This journal is © The Owner Societies 2010

|               |    |   |           |           |           |
|---------------|----|---|-----------|-----------|-----------|
| 22            | 1  | 0 | -0.447158 | 4.689879  | 0.944103  |
| 23            | 1  | 0 | -0.424076 | 4.718554  | -0.825079 |
| 24            | 1  | 0 | -3.800807 | -1.230482 | -0.127454 |
| 25            | 1  | 0 | -4.714510 | -0.051369 | 0.845863  |
| 2CuN (CN) 2T  |    |   |           |           |           |
| 1             | 29 | 0 | -1.131844 | -0.362262 | -0.000601 |
| 2             | 6  | 0 | 0.073059  | -1.866116 | -0.041845 |
| 3             | 6  | 0 | 0.040130  | -3.133716 | -0.037967 |
| 4             | 29 | 0 | 1.437327  | -0.498322 | -0.087663 |
| 5             | 7  | 0 | 3.015362  | 0.483536  | -0.134073 |
| 6             | 6  | 0 | 4.088614  | 1.018695  | -0.144337 |
| 7             | 7  | 0 | 5.167175  | 1.683259  | -0.231841 |
| 8             | 6  | 0 | 6.417644  | 1.633805  | 0.149456  |
| 9             | 7  | 0 | 7.575914  | 1.684144  | 0.442336  |
| 10            | 6  | 0 | 0.567198  | -4.520459 | -0.063864 |
| 11            | 1  | 0 | 0.263353  | -5.068895 | 0.835562  |
| 12            | 7  | 0 | -2.852507 | -1.454996 | 0.099711  |
| 13            | 7  | 0 | -2.815705 | -2.754201 | 0.104565  |
| 14            | 6  | 0 | -4.199521 | -0.830007 | 0.167658  |
| 15            | 7  | 0 | -2.068449 | -3.693661 | 0.071397  |
| 16            | 1  | 0 | -4.723252 | -1.106273 | 1.092416  |
| 17            | 1  | 0 | -4.037092 | 0.248371  | 0.156232  |
| 18            | 1  | 0 | -4.816227 | -1.110973 | -0.696403 |
| 19            | 1  | 0 | 1.662797  | -4.507263 | -0.115974 |
| 20            | 1  | 0 | 0.179595  | -5.067596 | -0.931363 |
| 21            | 6  | 0 | -2.153541 | 2.569379  | -0.010768 |
| 22            | 7  | 0 | -1.733518 | 1.446210  | -0.001562 |
| 23            | 7  | 0 | -2.480751 | 3.800535  | -0.021910 |
| 24            | 6  | 0 | -3.576691 | 4.519833  | -0.016267 |
| 25            | 7  | 0 | -4.511742 | 5.265330  | -0.013364 |
| CuN (CN) 2T+C |    |   |           |           |           |
| 1             | 29 | 0 | 1.284459  | -0.200048 | 0.001378  |
| 2             | 6  | 0 | 0.464934  | 1.548775  | -0.016582 |
| 3             | 6  | 0 | 0.816632  | 2.766852  | -0.009767 |
| 4             | 29 | 0 | -1.182289 | 0.543623  | -0.046449 |
| 5             | 7  | 0 | 1.448668  | -2.174092 | 0.001280  |
| 6             | 6  | 0 | 1.506460  | -2.831452 | 1.172621  |
| 7             | 6  | 0 | 1.547497  | -2.827677 | -1.169443 |
| 8             | 7  | 0 | 1.567066  | -3.322887 | 2.256005  |
| 9             | 7  | 0 | 1.645923  | -3.315676 | -2.251604 |
| 10            | 7  | 0 | -2.948450 | -0.034127 | -0.079642 |
| 11            | 6  | 0 | -4.118595 | -0.296715 | -0.092468 |
| 12            | 7  | 0 | -5.321702 | -0.697067 | -0.152069 |
| 13            | 6  | 0 | -6.541121 | -0.280451 | 0.070607  |
| 14            | 7  | 0 | -7.690982 | 0.001045  | 0.239984  |
| 15            | 6  | 0 | 0.651817  | 4.241410  | -0.016217 |
| 16            | 1  | 0 | 1.102359  | 4.686748  | 0.878604  |
| 17            | 7  | 0 | 3.221999  | 0.423018  | 0.045704  |
| 18            | 7  | 0 | 3.497854  | 1.693641  | 0.052695  |
| 19            | 6  | 0 | 4.384362  | -0.504802 | 0.069901  |
| 20            | 7  | 0 | 3.001095  | 2.786322  | 0.042187  |
| 21            | 1  | 0 | 4.984396  | -0.369414 | 0.979189  |
| 22            | 1  | 0 | 3.974217  | -1.515313 | 0.060736  |
| 23            | 1  | 0 | 5.022374  | -0.368550 | -0.813035 |
| 24            | 1  | 0 | -0.413263 | 4.502335  | -0.042192 |
| 25            | 1  | 0 | 1.144775  | 4.683650  | -0.889964 |

## CuN (CN) 2C+T

|    |    |   |           |           |           |
|----|----|---|-----------|-----------|-----------|
| 1  | 29 | 0 | -0.649937 | 0.605566  | -0.000395 |
| 2  | 6  | 0 | 1.082230  | 1.446997  | 0.000051  |
| 3  | 6  | 0 | 1.605882  | 2.601337  | 0.000536  |
| 4  | 29 | 0 | 1.732272  | -0.377191 | -0.000114 |
| 5  | 7  | 0 | -1.731457 | 2.338374  | -0.000134 |
| 6  | 7  | 0 | -1.136351 | 3.493468  | 0.000375  |
| 7  | 6  | 0 | -3.217886 | 2.357548  | -0.000434 |
| 8  | 7  | 0 | -0.056222 | 4.017895  | 0.000750  |
| 9  | 1  | 0 | -3.612068 | 2.855862  | -0.895999 |
| 10 | 7  | 0 | 2.813033  | -1.971756 | 0.000167  |
| 11 | 6  | 0 | 3.213943  | -2.508050 | 1.169230  |
| 12 | 6  | 0 | 3.215582  | -2.507468 | -1.168595 |
| 13 | 7  | 0 | 3.530156  | -2.916760 | 2.241550  |
| 14 | 7  | 0 | 3.533315  | -2.915593 | -2.240689 |
| 15 | 6  | 0 | 2.681222  | 3.623365  | 0.000837  |
| 16 | 1  | 0 | 3.664679  | 3.137697  | 0.001391  |
| 17 | 1  | 0 | 2.605087  | 4.266734  | 0.885310  |
| 18 | 1  | 0 | 2.605896  | 4.266338  | -0.884002 |
| 19 | 1  | 0 | -3.536822 | 1.314673  | -0.000942 |
| 20 | 1  | 0 | -3.612439 | 2.855092  | 0.895396  |
| 21 | 7  | 0 | -1.974819 | -0.763127 | -0.000919 |
| 22 | 6  | 0 | -2.846693 | -1.586520 | -0.001111 |
| 23 | 7  | 0 | -3.683477 | -2.546660 | -0.001845 |
| 24 | 6  | 0 | -4.984016 | -2.710105 | 0.000216  |
| 25 | 7  | 0 | -6.151839 | -2.967542 | 0.002066  |

## I4

## N (CN) 2C

|    |    |   |           |           |           |
|----|----|---|-----------|-----------|-----------|
| 1  | 29 | 0 | -0.203835 | -0.422452 | 0.104969  |
| 2  | 7  | 0 | -2.188115 | -0.336650 | 0.095025  |
| 3  | 6  | 0 | -2.881017 | -1.362465 | -0.429736 |
| 4  | 6  | 0 | -2.830508 | 0.710418  | 0.636308  |
| 5  | 7  | 0 | -3.422244 | -2.306102 | -0.916164 |
| 6  | 7  | 0 | -3.310032 | 1.682544  | 1.133075  |
| 7  | 7  | 0 | 0.794105  | 1.279783  | -0.337769 |
| 8  | 7  | 0 | 2.100397  | 1.563946  | -0.398948 |
| 9  | 6  | 0 | -0.068634 | 2.438581  | -0.697604 |
| 10 | 7  | 0 | 3.044564  | 0.720034  | -0.168005 |
| 11 | 1  | 0 | -0.550252 | 2.270634  | -1.671517 |
| 12 | 6  | 0 | 1.479015  | -1.130523 | 0.281113  |
| 13 | 6  | 0 | 2.735575  | -0.691624 | 0.180899  |
| 14 | 6  | 0 | 4.006307  | -1.487242 | 0.388946  |
| 15 | 1  | 0 | 3.787728  | -2.529577 | 0.643205  |
| 16 | 1  | 0 | 4.597607  | -1.036119 | 1.196904  |
| 17 | 1  | 0 | 4.614515  | -1.459552 | -0.525012 |
| 18 | 1  | 0 | -0.854299 | 2.570015  | 0.054149  |
| 19 | 1  | 0 | 0.540752  | 3.347946  | -0.751891 |

## N (CN) 2T

|   |    |   |           |           |           |
|---|----|---|-----------|-----------|-----------|
| 1 | 29 | 0 | -0.214135 | -0.396313 | 0.004104  |
| 2 | 7  | 0 | -1.350150 | 1.281029  | -0.003340 |
| 3 | 7  | 0 | -2.672099 | 1.487197  | -0.006645 |
| 4 | 6  | 0 | -0.581984 | 2.556127  | 0.000985  |
| 5 | 7  | 0 | -3.552649 | 0.549481  | -0.006865 |

Supplementary Material for PCCP  
 This journal is © The Owner Societies 2010

|              |    |   |           |           |           |
|--------------|----|---|-----------|-----------|-----------|
| 6            | 1  | 0 | -0.794273 | 3.141951  | 0.906860  |
| 7            | 6  | 0 | -1.844672 | -1.230347 | 0.002305  |
| 8            | 6  | 0 | -3.132167 | -0.877542 | -0.001864 |
| 9            | 6  | 0 | -4.336653 | -1.794336 | -0.002454 |
| 10           | 1  | 0 | -4.955441 | -1.594338 | 0.882458  |
| 11           | 1  | 0 | -4.037050 | -2.847482 | 0.000199  |
| 12           | 1  | 0 | -4.951889 | -1.597784 | -0.890600 |
| 13           | 1  | 0 | 0.482026  | 2.309133  | -0.023192 |
| 14           | 1  | 0 | -0.830356 | 3.168721  | -0.877269 |
| 15           | 7  | 0 | 1.675544  | -0.080152 | 0.007611  |
| 16           | 6  | 0 | 2.867731  | 0.030832  | 0.005813  |
| 17           | 7  | 0 | 4.118358  | 0.305735  | 0.007056  |
| 18           | 6  | 0 | 5.252404  | -0.352271 | -0.005119 |
| 19           | 7  | 0 | 6.345132  | -0.840704 | -0.014314 |
| Br           |    |   |           |           |           |
| 1            | 29 | 0 | -0.239153 | -0.426262 | 0.001621  |
| 2            | 35 | 0 | -2.684447 | -0.347876 | -0.001215 |
| 3            | 7  | 0 | 0.755689  | 1.326119  | 0.000555  |
| 4            | 7  | 0 | 2.058507  | 1.632244  | -0.002351 |
| 5            | 6  | 0 | -0.108742 | 2.537773  | 0.001962  |
| 6            | 7  | 0 | 3.010484  | 0.764244  | -0.002790 |
| 7            | 6  | 0 | 1.454631  | -1.164891 | 0.002948  |
| 8            | 6  | 0 | 2.704521  | -0.689574 | 0.000009  |
| 9            | 6  | 0 | 3.980978  | -1.505718 | -0.000905 |
| 10           | 1  | 0 | 3.767497  | -2.579933 | 0.002025  |
| 11           | 1  | 0 | 4.582156  | -1.256266 | 0.884060  |
| 12           | 1  | 0 | 4.578335  | -1.260435 | -0.889621 |
| 13           | 1  | 0 | -1.149793 | 2.204720  | -0.000864 |
| 14           | 1  | 0 | 0.077767  | 3.154997  | -0.889122 |
| 15           | 1  | 0 | 0.074039  | 3.150376  | 0.897061  |
| 2CuN (CN) 2C |    |   |           |           |           |
| 1            | 29 | 0 | -1.089029 | -0.161255 | -0.016930 |
| 2            | 6  | 0 | -0.082118 | 1.421974  | 0.010344  |
| 3            | 6  | 0 | -0.458748 | 2.696739  | 0.014431  |
| 4            | 29 | 0 | 1.479723  | 0.326262  | 0.014001  |
| 5            | 7  | 0 | -2.697937 | 0.942079  | -0.048686 |
| 6            | 7  | 0 | -2.826502 | 2.260565  | -0.033340 |
| 7            | 6  | 0 | -3.998351 | 0.213621  | -0.038150 |
| 8            | 7  | 0 | -1.882491 | 3.120030  | -0.010976 |
| 9            | 1  | 0 | -4.668114 | 0.624547  | -0.802472 |
| 10           | 7  | 0 | -1.492857 | -2.090328 | -0.024267 |
| 11           | 6  | 0 | -1.789564 | -2.708191 | 1.135177  |
| 12           | 6  | 0 | -1.540092 | -2.762634 | -1.190629 |
| 13           | 7  | 0 | -2.050335 | -3.165789 | 2.202568  |
| 14           | 7  | 0 | -1.570709 | -3.273499 | -2.265147 |
| 15           | 7  | 0 | 3.274183  | -0.347829 | 0.034260  |
| 16           | 6  | 0 | 3.883431  | -0.614936 | 1.208386  |
| 17           | 6  | 0 | 3.956328  | -0.483302 | -1.122258 |
| 18           | 7  | 0 | 4.354838  | -0.823642 | 2.280338  |
| 19           | 7  | 0 | 4.494460  | -0.570596 | -2.179460 |
| 20           | 6  | 0 | 0.438574  | 3.917031  | 0.042619  |
| 21           | 1  | 0 | 1.496468  | 3.639912  | 0.064540  |
| 22           | 1  | 0 | 0.204582  | 4.521770  | 0.927774  |
| 23           | 1  | 0 | 0.244533  | 4.533167  | -0.844301 |
| 24           | 1  | 0 | -3.803618 | -0.838485 | -0.252438 |
| 25           | 1  | 0 | -4.479286 | 0.295148  | 0.945285  |

## 2CuN (CN) 2T

|    |    |   |           |           |           |
|----|----|---|-----------|-----------|-----------|
| 1  | 29 | 0 | -1.214285 | -0.340137 | 0.037575  |
| 2  | 6  | 0 | -0.065919 | -1.819460 | -0.058724 |
| 3  | 6  | 0 | -0.309289 | -3.126606 | -0.055752 |
| 4  | 29 | 0 | 1.364242  | -0.562043 | -0.136512 |
| 5  | 7  | 0 | 2.978461  | 0.341025  | -0.230251 |
| 6  | 6  | 0 | 4.065254  | 0.851197  | -0.249703 |
| 7  | 7  | 0 | 5.185476  | 1.419040  | -0.401373 |
| 8  | 6  | 0 | 6.293321  | 1.707470  | 0.229591  |
| 9  | 7  | 0 | 7.342212  | 2.014889  | 0.712815  |
| 10 | 6  | 0 | 0.708918  | -4.243906 | -0.159545 |
| 11 | 1  | 0 | 0.641662  | -4.884265 | 0.729082  |
| 12 | 7  | 0 | -2.692315 | -1.611766 | 0.171464  |
| 13 | 7  | 0 | -2.696857 | -2.936835 | 0.153199  |
| 14 | 6  | 0 | -4.051001 | -1.012132 | 0.288538  |
| 15 | 7  | 0 | -1.674797 | -3.697905 | 0.055820  |
| 16 | 1  | 0 | -4.554464 | -1.377723 | 1.192242  |
| 17 | 1  | 0 | -3.938357 | 0.071391  | 0.348961  |
| 18 | 1  | 0 | -4.661654 | -1.264443 | -0.588086 |
| 19 | 1  | 0 | 1.727521  | -3.854584 | -0.246753 |
| 20 | 1  | 0 | 0.482810  | -4.864749 | -1.035666 |
| 21 | 6  | 0 | -2.147267 | 2.618478  | 0.059485  |
| 22 | 7  | 0 | -1.767551 | 1.479846  | 0.068582  |
| 23 | 7  | 0 | -2.431821 | 3.853832  | 0.084653  |
| 24 | 6  | 0 | -3.440356 | 4.668063  | -0.091795 |
| 25 | 7  | 0 | -4.295412 | 5.492008  | -0.229650 |

## CuN (CN) 2C+T

|    |    |   |           |           |           |
|----|----|---|-----------|-----------|-----------|
| 1  | 29 | 0 | 0.702440  | 0.660212  | -0.014916 |
| 2  | 6  | 0 | -1.039068 | 1.350793  | 0.000954  |
| 3  | 6  | 0 | -1.497911 | 2.598408  | 0.003980  |
| 4  | 29 | 0 | -1.645315 | -0.460609 | -0.001309 |
| 5  | 7  | 0 | 1.334510  | 2.507768  | 0.004837  |
| 6  | 7  | 0 | 0.663039  | 3.650564  | 0.011394  |
| 7  | 6  | 0 | 2.813082  | 2.683202  | 0.049846  |
| 8  | 7  | 0 | -0.607610 | 3.785501  | 0.005608  |
| 9  | 1  | 0 | 3.126782  | 3.072778  | 1.027298  |
| 10 | 7  | 0 | -2.670863 | -2.080732 | 0.012844  |
| 11 | 6  | 0 | -3.094472 | -2.619494 | -1.149088 |
| 12 | 6  | 0 | -3.015347 | -2.649206 | 1.186791  |
| 13 | 7  | 0 | -3.433232 | -3.028525 | -2.213598 |
| 14 | 7  | 0 | -3.282484 | -3.086297 | 2.260447  |
| 15 | 6  | 0 | -2.946709 | 3.041433  | 0.005667  |
| 16 | 1  | 0 | -3.630059 | 2.187253  | -0.004434 |
| 17 | 1  | 0 | -3.138292 | 3.668108  | -0.874337 |
| 18 | 1  | 0 | -3.141846 | 3.649443  | 0.898058  |
| 19 | 1  | 0 | 3.275946  | 1.708567  | -0.112017 |
| 20 | 1  | 0 | 3.138293  | 3.378313  | -0.733619 |
| 21 | 7  | 0 | 2.100607  | -0.626876 | -0.043245 |
| 22 | 6  | 0 | 3.027315  | -1.389829 | -0.053980 |
| 23 | 7  | 0 | 3.923290  | -2.285469 | -0.078607 |
| 24 | 6  | 0 | 5.219595  | -2.437955 | -0.006637 |
| 25 | 7  | 0 | 6.388980  | -2.681226 | 0.046660  |

## CuN (CN) 2T+C

|   |    |   |           |           |           |
|---|----|---|-----------|-----------|-----------|
| 1 | 29 | 0 | -1.340019 | -0.270782 | -0.008056 |
| 2 | 6  | 0 | -0.603596 | 1.457561  | 0.027139  |

Supplementary Material for PCCP  
 This journal is © The Owner Societies 2010

|    |    |   |           |           |           |
|----|----|---|-----------|-----------|-----------|
| 3  | 6  | 0 | -1.190893 | 2.649532  | -0.017256 |
| 4  | 29 | 0 | 1.099753  | 0.613531  | 0.129842  |
| 5  | 7  | 0 | -1.395878 | -2.242733 | 0.008317  |
| 6  | 6  | 0 | -1.379715 | -2.918687 | -1.156164 |
| 7  | 6  | 0 | -1.491922 | -2.895216 | 1.182293  |
| 8  | 7  | 0 | -1.372647 | -3.428749 | -2.231657 |
| 9  | 7  | 0 | -1.587932 | -3.383794 | 2.263496  |
| 10 | 7  | 0 | 2.891139  | 0.159293  | 0.233629  |
| 11 | 6  | 0 | 4.073281  | -0.049842 | 0.261451  |
| 12 | 7  | 0 | 5.301825  | -0.301106 | 0.423054  |
| 13 | 6  | 0 | 6.452541  | -0.311445 | -0.195555 |
| 14 | 7  | 0 | 7.550305  | -0.350818 | -0.666393 |
| 15 | 6  | 0 | -0.510269 | 4.002734  | 0.022656  |
| 16 | 1  | 0 | -0.756776 | 4.563349  | -0.887905 |
| 17 | 7  | 0 | -3.105247 | 0.546606  | -0.128770 |
| 18 | 7  | 0 | -3.450009 | 1.826293  | -0.159981 |
| 19 | 6  | 0 | -4.266807 | -0.385004 | -0.189327 |
| 20 | 7  | 0 | -2.661696 | 2.829970  | -0.116780 |
| 21 | 1  | 0 | -4.828407 | -0.238675 | -1.120425 |
| 22 | 1  | 0 | -3.885852 | -1.407020 | -0.156081 |
| 23 | 1  | 0 | -4.935980 | -0.220785 | 0.664504  |
| 24 | 1  | 0 | 0.576299  | 3.905078  | 0.102766  |
| 25 | 1  | 0 | -0.886319 | 4.575805  | 0.879527  |

TS 4-P

CuBr

|    |    |   |           |           |           |
|----|----|---|-----------|-----------|-----------|
| 1  | 29 | 0 | 0.690780  | -0.465652 | 0.000050  |
| 2  | 6  | 0 | -1.098276 | -0.955504 | 0.000040  |
| 3  | 6  | 0 | -2.416366 | -1.142901 | 0.000015  |
| 4  | 6  | 0 | -3.052516 | -2.525456 | 0.000156  |
| 5  | 1  | 0 | -3.691329 | -2.629092 | 0.887053  |
| 6  | 7  | 0 | -1.939646 | 1.596453  | -0.000318 |
| 7  | 7  | 0 | -3.176686 | 1.156261  | -0.000225 |
| 8  | 6  | 0 | -1.763462 | 3.060174  | 0.000306  |
| 9  | 7  | 0 | -3.488200 | -0.111400 | -0.000189 |
| 10 | 1  | 0 | -1.187198 | 3.366141  | -0.884664 |
| 11 | 1  | 0 | -2.733701 | 3.578539  | -0.003746 |
| 12 | 1  | 0 | -1.194485 | 3.366800  | 0.889831  |
| 13 | 1  | 0 | -2.301272 | -3.322677 | 0.000358  |
| 14 | 1  | 0 | -3.691134 | -2.629368 | -0.886849 |
| 15 | 35 | 0 | 2.999484  | 0.076185  | -0.000041 |

CuN (CN) 2C

|    |    |   |           |           |           |
|----|----|---|-----------|-----------|-----------|
| 1  | 29 | 0 | 0.641732  | -0.447519 | 0.017386  |
| 2  | 6  | 0 | -1.158692 | -0.874508 | 0.005663  |
| 3  | 6  | 0 | -2.465386 | -1.152653 | -0.019000 |
| 4  | 7  | 0 | 2.525388  | -0.019152 | -0.004494 |
| 5  | 6  | 0 | 3.448900  | -0.996799 | 0.030993  |
| 6  | 6  | 0 | 2.894692  | 1.272704  | -0.070070 |
| 7  | 7  | 0 | 4.208033  | -1.913660 | 0.070650  |
| 8  | 7  | 0 | 3.137862  | 2.437637  | -0.128888 |
| 9  | 6  | 0 | -3.011838 | -2.570379 | -0.043017 |
| 10 | 1  | 0 | -3.674197 | -2.719086 | 0.819137  |
| 11 | 7  | 0 | -1.983459 | 1.471951  | 0.014170  |
| 12 | 7  | 0 | -3.245526 | 1.100157  | -0.015228 |
| 13 | 6  | 0 | -1.685901 | 2.910671  | 0.098335  |

|              |    |   |           |           |           |
|--------------|----|---|-----------|-----------|-----------|
| 14           | 7  | 0 | -3.565598 | -0.170477 | -0.041619 |
| 15           | 1  | 0 | -2.263443 | 3.492913  | -0.635358 |
| 16           | 1  | 0 | -1.898186 | 3.306470  | 1.105339  |
| 17           | 1  | 0 | -0.618942 | 3.049341  | -0.103650 |
| 18           | 1  | 0 | -2.213381 | -3.319793 | -0.017066 |
| 19           | 1  | 0 | -3.609643 | -2.711200 | -0.952164 |
| CuN (CN) 2T  |    |   |           |           |           |
| 1            | 29 | 0 | 0.146797  | -0.579949 | -0.122848 |
| 2            | 6  | 0 | -1.668581 | -0.887677 | 0.011868  |
| 3            | 6  | 0 | -2.994263 | -0.994000 | 0.106801  |
| 4            | 6  | 0 | -3.714960 | -2.331968 | 0.172244  |
| 5            | 1  | 0 | -4.288929 | -2.388662 | 1.106131  |
| 6            | 7  | 0 | -2.264676 | 1.630566  | 0.030496  |
| 7            | 7  | 0 | -3.542278 | 1.341261  | 0.120527  |
| 8            | 6  | 0 | -1.901336 | 3.057620  | -0.025426 |
| 9            | 7  | 0 | -3.977441 | 0.110164  | 0.165508  |
| 10           | 1  | 0 | -2.790101 | 3.693692  | 0.091883  |
| 11           | 1  | 0 | -1.183767 | 3.289040  | 0.773628  |
| 12           | 1  | 0 | -1.419734 | 3.288310  | -0.986638 |
| 13           | 1  | 0 | -3.018515 | -3.175878 | 0.125048  |
| 14           | 1  | 0 | -4.425008 | -2.401371 | -0.661885 |
| 15           | 6  | 0 | 3.167059  | -0.124822 | -0.300795 |
| 16           | 7  | 0 | 4.414267  | 0.066435  | -0.493443 |
| 17           | 7  | 0 | 1.981502  | -0.287988 | -0.258528 |
| 18           | 6  | 0 | 5.521372  | 0.126658  | 0.203783  |
| 19           | 7  | 0 | 6.590509  | 0.202208  | 0.735952  |
| 2CuN (CN) 2C |    |   |           |           |           |
| 1            | 29 | 0 | -1.540697 | 0.236917  | -0.057977 |
| 2            | 6  | 0 | -0.017830 | 1.319958  | -0.420958 |
| 3            | 6  | 0 | 0.300596  | 2.595057  | -0.711877 |
| 4            | 29 | 0 | 1.132336  | -0.163825 | -0.205484 |
| 5            | 7  | 0 | -3.240816 | -0.590822 | 0.258306  |
| 6            | 6  | 0 | -3.882752 | -0.355062 | 1.420982  |
| 7            | 6  | 0 | -3.822680 | -1.351796 | -0.691403 |
| 8            | 7  | 0 | -4.385274 | -0.097238 | 2.468198  |
| 9            | 7  | 0 | -4.276154 | -2.004308 | -1.576644 |
| 10           | 7  | 0 | 1.962647  | -1.934503 | -0.252507 |
| 11           | 6  | 0 | -0.547548 | 3.513003  | -1.569745 |
| 12           | 1  | 0 | -0.845054 | 4.388215  | -0.978580 |
| 13           | 7  | 0 | 2.066923  | 1.324762  | 0.875939  |
| 14           | 7  | 0 | 2.294782  | 2.591314  | 0.554360  |
| 15           | 6  | 0 | 3.045504  | 0.734940  | 1.834630  |
| 16           | 7  | 0 | 1.490564  | 3.266402  | -0.214918 |
| 17           | 1  | 0 | 3.435750  | 1.523973  | 2.485167  |
| 18           | 1  | 0 | 2.539094  | -0.020945 | 2.441387  |
| 19           | 1  | 0 | 3.877360  | 0.256232  | 1.301684  |
| 20           | 1  | 0 | -1.442771 | 3.008833  | -1.944477 |
| 21           | 1  | 0 | 0.048335  | 3.869052  | -2.418906 |
| 22           | 6  | 0 | 2.222480  | -2.585468 | 0.895907  |
| 23           | 7  | 0 | 2.421722  | -3.071491 | 1.964376  |
| 24           | 6  | 0 | 2.316354  | -2.464177 | -1.439606 |
| 25           | 7  | 0 | 2.600607  | -2.853225 | -2.527609 |
| 2CuN (CN) 2T |    |   |           |           |           |
| 1            | 29 | 0 | -1.382234 | 0.138171  | -0.368285 |
| 2            | 6  | 0 | 0.000377  | 1.436272  | -0.549229 |



Supplementary Material for PCCP  
 This journal is © The Owner Societies 2010

|               |    |   |           |           |           |
|---------------|----|---|-----------|-----------|-----------|
| 3             | 6  | 0 | -0.000842 | 2.770306  | -0.888824 |
| 4             | 29 | 0 | 1.383757  | 0.139069  | -0.368624 |
| 5             | 7  | 0 | 2.794310  | -1.052352 | -0.190119 |
| 6             | 6  | 0 | 3.755744  | -1.761986 | -0.082363 |
| 7             | 7  | 0 | 4.684732  | -2.618755 | 0.021475  |
| 8             | 6  | 0 | 5.981576  | -2.700841 | 0.173581  |
| 9             | 7  | 0 | 7.154422  | -2.886551 | 0.310413  |
| 10            | 6  | 0 | 0.000706  | 3.220161  | -2.337844 |
| 11            | 1  | 0 | -0.884922 | 3.838900  | -2.524847 |
| 12            | 7  | 0 | -0.003595 | 2.230842  | 1.615069  |
| 13            | 7  | 0 | -0.005071 | 3.501267  | 1.330925  |
| 14            | 6  | 0 | -0.005433 | 1.790321  | 3.018942  |
| 15            | 7  | 0 | -0.003529 | 3.845244  | 0.031773  |
| 16            | 1  | 0 | -0.007008 | 2.661629  | 3.684752  |
| 17            | 1  | 0 | -0.894418 | 1.178663  | 3.211450  |
| 18            | 1  | 0 | 0.883767  | 1.179814  | 3.214038  |
| 19            | 1  | 0 | 0.002218  | 2.373073  | -3.029776 |
| 20            | 1  | 0 | 0.885949  | 3.840145  | -2.522570 |
| 21            | 6  | 0 | -3.753227 | -1.764280 | -0.082802 |
| 22            | 7  | 0 | -4.681836 | -2.621503 | 0.020666  |
| 23            | 7  | 0 | -2.792100 | -1.054153 | -0.190044 |
| 24            | 6  | 0 | -5.978796 | -2.704273 | 0.171371  |
| 25            | 7  | 0 | -7.151673 | -2.890650 | 0.307030  |
| CuN (CN) 2C+T |    |   |           |           |           |
| 1             | 29 | 0 | 1.384694  | -0.285056 | 0.177588  |
| 2             | 6  | 0 | 0.538542  | 1.401653  | 0.291172  |
| 3             | 6  | 0 | 1.098760  | 2.617399  | 0.427907  |
| 4             | 29 | 0 | -1.159350 | 0.555760  | 0.181446  |
| 5             | 7  | 0 | 1.855318  | -2.173825 | 0.383537  |
| 6             | 6  | 0 | 1.978120  | -2.958705 | -0.701970 |
| 7             | 6  | 0 | 2.082305  | -2.662829 | 1.617825  |
| 8             | 7  | 0 | 2.073391  | -3.562523 | -1.723744 |
| 9             | 7  | 0 | 2.269563  | -3.008160 | 2.741146  |
| 10            | 7  | 0 | -2.913865 | -0.029234 | 0.114209  |
| 11            | 6  | 0 | -4.074748 | -0.328125 | 0.052805  |
| 12            | 7  | 0 | -5.274136 | -0.730884 | 0.087458  |
| 13            | 6  | 0 | -6.442787 | -0.540200 | -0.466243 |
| 14            | 7  | 0 | -7.550608 | -0.441382 | -0.903871 |
| 15            | 6  | 0 | 0.486405  | 3.753176  | 1.223823  |
| 16            | 1  | 0 | 1.188173  | 4.068482  | 2.005641  |
| 17            | 7  | 0 | 2.505272  | 0.894068  | -1.088492 |
| 18            | 7  | 0 | 2.974422  | 2.124357  | -0.919263 |
| 19            | 6  | 0 | 3.310080  | 0.042923  | -2.012317 |
| 20            | 7  | 0 | 2.352561  | 3.008716  | -0.195044 |
| 21            | 1  | 0 | 4.076563  | -0.518329 | -1.461932 |
| 22            | 1  | 0 | 2.647517  | -0.670403 | -2.510320 |
| 23            | 1  | 0 | 3.792885  | 0.677693  | -2.762097 |
| 24            | 1  | 0 | -0.460719 | 3.461785  | 1.686667  |
| 25            | 1  | 0 | 0.317114  | 4.610686  | 0.560494  |
| P             |    |   |           |           |           |
| CuBr          |    |   |           |           |           |
| 1             | 29 | 0 | 0.583118  | 0.025220  | 0.000024  |
| 2             | 6  | 0 | -1.336279 | 0.029528  | -0.000033 |
| 3             | 6  | 0 | -2.277393 | 1.087642  | 0.000022  |

|    |    |   |           |           |           |
|----|----|---|-----------|-----------|-----------|
| 4  | 6  | 0 | -2.018957 | 2.569099  | 0.000202  |
| 5  | 1  | 0 | -2.455140 | 3.054490  | -0.884904 |
| 6  | 7  | 0 | -2.166184 | -1.081887 | -0.000229 |
| 7  | 7  | 0 | -3.534656 | -0.750455 | -0.000253 |
| 8  | 6  | 0 | -1.794895 | -2.490642 | 0.000303  |
| 9  | 7  | 0 | -3.578539 | 0.590157  | -0.000127 |
| 10 | 1  | 0 | -2.715863 | -3.081535 | -0.004384 |
| 11 | 1  | 0 | -1.197500 | -2.734687 | -0.886471 |
| 12 | 1  | 0 | -1.205640 | -2.736557 | 0.892063  |
| 13 | 1  | 0 | -0.939077 | 2.756484  | -0.001381 |
| 14 | 1  | 0 | -2.452328 | 3.053863  | 0.887049  |
| 15 | 35 | 0 | 2.959312  | 0.013660  | -0.000039 |

CuN (CN) 2C

|    |    |   |           |           |           |
|----|----|---|-----------|-----------|-----------|
| 1  | 29 | 0 | 0.540945  | 0.023920  | -0.000071 |
| 2  | 6  | 0 | -1.365744 | 0.031785  | -0.000052 |
| 3  | 6  | 0 | -2.298648 | 1.095534  | 0.000210  |
| 4  | 7  | 0 | 2.479292  | 0.015927  | -0.000080 |
| 5  | 6  | 0 | 3.159079  | 1.175785  | -0.001526 |
| 6  | 6  | 0 | 3.126958  | -1.161927 | 0.001837  |
| 7  | 7  | 0 | 3.686719  | 2.244200  | -0.003541 |
| 8  | 7  | 0 | 3.622407  | -2.245913 | 0.003554  |
| 9  | 6  | 0 | -2.037560 | 2.576595  | 0.002686  |
| 10 | 1  | 0 | -2.496373 | 3.065414  | -0.868210 |
| 11 | 7  | 0 | -2.198320 | -1.077788 | -0.000138 |
| 12 | 7  | 0 | -3.562356 | -0.737727 | -0.000381 |
| 13 | 6  | 0 | -1.836200 | -2.490168 | -0.002406 |
| 14 | 7  | 0 | -3.601328 | 0.602185  | -0.000001 |
| 15 | 1  | 0 | -2.761610 | -3.073237 | 0.006696  |
| 16 | 1  | 0 | -1.254938 | -2.742193 | -0.897540 |
| 17 | 1  | 0 | -1.238266 | -2.739951 | 0.882185  |
| 18 | 1  | 0 | -0.958832 | 2.768945  | -0.023776 |
| 19 | 1  | 0 | -2.449592 | 3.055523  | 0.902311  |

CuN (CN) 2T

|    |    |   |           |           |           |
|----|----|---|-----------|-----------|-----------|
| 1  | 29 | 0 | 0.084837  | -0.089749 | -0.113582 |
| 2  | 6  | 0 | -1.816740 | -0.011876 | 0.013851  |
| 3  | 6  | 0 | -2.793034 | -1.033077 | 0.101098  |
| 4  | 6  | 0 | -2.595714 | -2.523874 | 0.119650  |
| 5  | 1  | 0 | -3.027649 | -2.973605 | 1.024707  |
| 6  | 7  | 0 | -2.602768 | 1.131698  | 0.039607  |
| 7  | 7  | 0 | -3.977136 | 0.851478  | 0.136419  |
| 8  | 6  | 0 | -2.184333 | 2.526681  | -0.015775 |
| 9  | 7  | 0 | -4.071582 | -0.484911 | 0.172645  |
| 10 | 1  | 0 | -3.083979 | 3.148161  | 0.015886  |
| 11 | 1  | 0 | -1.539725 | 2.774323  | 0.836389  |
| 12 | 1  | 0 | -1.631787 | 2.730195  | -0.940911 |
| 13 | 1  | 0 | -1.525773 | -2.760816 | 0.093985  |
| 14 | 1  | 0 | -3.074935 | -3.003980 | -0.745499 |
| 15 | 6  | 0 | 3.142610  | -0.190504 | -0.273862 |
| 16 | 7  | 0 | 4.406086  | -0.288824 | -0.440664 |
| 17 | 7  | 0 | 1.945777  | -0.165955 | -0.238288 |
| 18 | 6  | 0 | 5.504116  | 0.066839  | 0.179269  |
| 19 | 7  | 0 | 6.568499  | 0.339844  | 0.653698  |

2CuN (CN) 2C

|   |    |   |           |           |           |
|---|----|---|-----------|-----------|-----------|
| 1 | 29 | 0 | -1.266913 | -0.126095 | -0.032551 |
| 2 | 6  | 0 | 0.000107  | 1.399748  | -0.036631 |

Supplementary Material for PCCP  
 This journal is © The Owner Societies 2010

|               |    |   |           |           |           |
|---------------|----|---|-----------|-----------|-----------|
| 3             | 6  | 0 | 0.001358  | 2.310053  | -1.129272 |
| 4             | 29 | 0 | 1.266697  | -0.126450 | -0.030778 |
| 5             | 7  | 0 | -2.763317 | -1.331524 | 0.008421  |
| 6             | 6  | 0 | -3.285057 | -1.680296 | 1.200171  |
| 7             | 6  | 0 | -3.311729 | -1.771378 | -1.140591 |
| 8             | 7  | 0 | -3.683961 | -1.932331 | 2.292941  |
| 9             | 7  | 0 | -3.737487 | -2.111499 | -2.198469 |
| 10            | 7  | 0 | 2.762954  | -1.331997 | 0.011667  |
| 11            | 6  | 0 | 0.003117  | 2.025330  | -2.604336 |
| 12            | 1  | 0 | -0.877836 | 2.466548  | -3.087148 |
| 13            | 7  | 0 | -0.000760 | 2.271077  | 1.065848  |
| 14            | 7  | 0 | -0.000162 | 3.598149  | 0.682774  |
| 15            | 6  | 0 | -0.002468 | 1.948893  | 2.495656  |
| 16            | 7  | 0 | 0.001152  | 3.616950  | -0.662631 |
| 17            | 1  | 0 | -0.002426 | 2.892514  | 3.045962  |
| 18            | 1  | 0 | -0.894843 | 1.371826  | 2.759973  |
| 19            | 1  | 0 | 0.888590  | 1.370646  | 2.761814  |
| 20            | 1  | 0 | -0.002630 | 0.947130  | -2.796399 |
| 21            | 1  | 0 | 0.891368  | 2.456132  | -3.083272 |
| 22            | 6  | 0 | 3.280274  | -1.685248 | 1.204026  |
| 23            | 7  | 0 | 3.675154  | -1.941476 | 2.297279  |
| 24            | 6  | 0 | 3.315926  | -1.767160 | -1.136948 |
| 25            | 7  | 0 | 3.745697  | -2.103154 | -2.194523 |
| 2CuN (CN) 2T  |    |   |           |           |           |
| 1             | 29 | 0 | 1.259158  | 0.149963  | 0.012135  |
| 2             | 6  | 0 | 0.001785  | 1.678782  | 0.027357  |
| 3             | 6  | 0 | -0.026644 | 2.558336  | 1.144634  |
| 4             | 29 | 0 | -1.263591 | 0.157930  | -0.049709 |
| 5             | 7  | 0 | -2.677092 | -1.039231 | -0.123840 |
| 6             | 6  | 0 | -3.639541 | -1.756190 | -0.132976 |
| 7             | 7  | 0 | -4.573575 | -2.610385 | -0.196974 |
| 8             | 6  | 0 | -5.848840 | -2.753746 | 0.054969  |
| 9             | 7  | 0 | -7.004966 | -2.988150 | 0.247778  |
| 10            | 6  | 0 | -0.067771 | 2.230324  | 2.609917  |
| 11            | 1  | 0 | 0.801941  | 2.652976  | 3.128732  |
| 12            | 7  | 0 | 0.033836  | 2.584695  | -1.046819 |
| 13            | 7  | 0 | 0.025790  | 3.900696  | -0.625628 |
| 14            | 6  | 0 | 0.071499  | 2.306495  | -2.483718 |
| 15            | 7  | 0 | -0.011481 | 3.878948  | 0.718819  |
| 16            | 1  | 0 | 0.105777  | 3.265907  | -3.005225 |
| 17            | 1  | 0 | 0.959984  | 1.718915  | -2.737991 |
| 18            | 1  | 0 | -0.822188 | 1.753683  | -2.792665 |
| 19            | 1  | 0 | -0.070909 | 1.146300  | 2.766074  |
| 20            | 1  | 0 | -0.966661 | 2.650509  | 3.078682  |
| 21            | 6  | 0 | 3.627246  | -1.776331 | -0.010259 |
| 22            | 7  | 0 | 4.551570  | -2.643132 | -0.026520 |
| 23            | 7  | 0 | 2.669077  | -1.053614 | -0.009360 |
| 24            | 6  | 0 | 5.853133  | -2.752919 | 0.038025  |
| 25            | 7  | 0 | 7.029046  | -2.962070 | 0.086022  |
| CuN (CN) 2T+C |    |   |           |           |           |
| 1             | 29 | 0 | 1.461988  | -0.450868 | 0.043228  |
| 2             | 6  | 0 | 0.715990  | 1.389140  | 0.027733  |
| 3             | 6  | 0 | 0.980084  | 2.255010  | 1.124514  |
| 4             | 29 | 0 | -0.944333 | 0.316101  | -0.015049 |
| 5             | 7  | 0 | 2.506375  | -2.064793 | 0.017967  |

|    |   |   |           |           |           |
|----|---|---|-----------|-----------|-----------|
| 6  | 6 | 0 | 2.890862  | -2.569117 | -1.169912 |
| 7  | 6 | 0 | 2.876923  | -2.650720 | 1.172518  |
| 8  | 7 | 0 | 3.188136  | -2.940744 | -2.261051 |
| 9  | 7 | 0 | 3.162302  | -3.102627 | 2.235820  |
| 10 | 7 | 0 | -2.655317 | -0.392936 | -0.071176 |
| 11 | 6 | 0 | -3.792009 | -0.777643 | -0.091295 |
| 12 | 7 | 0 | -4.942430 | -1.305058 | -0.150502 |
| 13 | 6 | 0 | -6.209129 | -1.024733 | 0.012586  |
| 14 | 7 | 0 | -7.388464 | -0.872753 | 0.134508  |
| 15 | 6 | 0 | 0.855209  | 1.987637  | 2.597418  |
| 16 | 1 | 0 | 1.824449  | 2.103026  | 3.098928  |
| 17 | 7 | 0 | 1.020893  | 2.213916  | -1.068631 |
| 18 | 7 | 0 | 1.429906  | 3.474460  | -0.678588 |
| 19 | 6 | 0 | 0.952950  | 1.906307  | -2.499290 |
| 20 | 7 | 0 | 1.403297  | 3.494632  | 0.666352  |
| 21 | 1 | 0 | 1.255770  | 2.803318  | -3.044341 |
| 22 | 1 | 0 | 1.628200  | 1.081285  | -2.749848 |
| 23 | 1 | 0 | -0.067812 | 1.631003  | -2.784759 |
| 24 | 1 | 0 | 0.491750  | 0.970915  | 2.780907  |
| 25 | 1 | 0 | 0.157477  | 2.694741  | 3.063378  |

Path 1,5 (CuBr)

I3

|    |    |   |           |           |           |
|----|----|---|-----------|-----------|-----------|
| 1  | 29 | 0 | 0.614093  | 0.519222  | 0.026484  |
| 2  | 35 | 0 | 2.861710  | -0.390075 | -0.044241 |
| 3  | 7  | 0 | -0.686811 | -1.355447 | 0.292687  |
| 4  | 7  | 0 | -1.825188 | -1.607965 | 0.110983  |
| 5  | 7  | 0 | -3.073601 | -1.542631 | -0.157703 |
| 6  | 6  | 0 | -0.862949 | 1.709008  | 0.001021  |
| 7  | 6  | 0 | -1.832948 | 2.488982  | -0.012567 |
| 8  | 6  | 0 | -2.983776 | 3.414317  | -0.018709 |
| 9  | 1  | 0 | -3.965091 | 2.820489  | -0.132081 |
| 10 | 1  | 0 | -2.895819 | 4.159088  | -0.896120 |
| 11 | 1  | 0 | -3.024995 | 4.012637  | 0.968009  |
| 12 | 6  | 0 | -3.808865 | -2.841731 | -0.081967 |
| 13 | 1  | 0 | -4.846941 | -2.612280 | -0.336538 |
| 14 | 1  | 0 | -3.424456 | -3.584361 | -0.798682 |
| 15 | 1  | 0 | -3.780802 | -3.281533 | 0.927369  |

TS34

|    |    |   |           |           |           |
|----|----|---|-----------|-----------|-----------|
| 1  | 29 | 0 | -0.647385 | 0.299547  | 0.000009  |
| 2  | 35 | 0 | -3.053754 | -0.092756 | 0.000005  |
| 3  | 7  | 0 | 0.533958  | -1.381526 | -0.000038 |
| 4  | 7  | 0 | 1.745829  | -1.552682 | -0.000053 |
| 5  | 7  | 0 | 2.798346  | -0.766550 | -0.000092 |
| 6  | 6  | 0 | 0.943944  | 1.307053  | 0.000015  |
| 7  | 6  | 0 | 2.227967  | 1.233716  | -0.000004 |
| 8  | 6  | 0 | 3.530841  | 1.963340  | -0.000015 |
| 9  | 1  | 0 | 3.351582  | 3.045738  | 0.000004  |
| 10 | 1  | 0 | 4.132352  | 1.722292  | -0.889323 |
| 11 | 1  | 0 | 4.132385  | 1.722268  | 0.889263  |
| 12 | 6  | 0 | 4.133372  | -1.402580 | 0.000089  |
| 13 | 1  | 0 | 4.305002  | -2.022776 | -0.893288 |
| 14 | 1  | 0 | 4.865679  | -0.589257 | 0.000027  |
| 15 | 1  | 0 | 4.304887  | -2.022539 | 0.893654  |

| I4 |    |   |           |           |           |  |
|----|----|---|-----------|-----------|-----------|--|
| 1  | 29 | 0 | -0.872424 | 0.125302  | -0.015484 |  |
| 2  | 35 | 0 | -3.265501 | -0.033082 | 0.015258  |  |
| 3  | 7  | 0 | 1.187903  | -1.182331 | -0.031710 |  |
| 4  | 7  | 0 | 2.452881  | -1.606836 | -0.022112 |  |
| 5  | 7  | 0 | 3.216060  | -0.467003 | 0.026660  |  |
| 6  | 6  | 0 | 1.091741  | 0.252607  | -0.036376 |  |
| 7  | 6  | 0 | 2.416213  | 0.680803  | 0.000430  |  |
| 8  | 6  | 0 | 3.000567  | 2.069243  | -0.005700 |  |
| 9  | 1  | 0 | 2.261789  | 2.759556  | -0.424949 |  |
| 10 | 1  | 0 | 3.918702  | 2.143834  | -0.606835 |  |
| 11 | 1  | 0 | 3.240101  | 2.423806  | 1.013084  |  |
| 12 | 6  | 0 | 4.665908  | -0.547633 | 0.040831  |  |
| 13 | 1  | 0 | 5.104675  | 0.021332  | -0.790710 |  |
| 14 | 1  | 0 | 5.080347  | -0.160377 | 0.982400  |  |
| 15 | 1  | 0 | 4.942732  | -1.600964 | -0.062941 |  |

| TS4P |    |   |           |           |           |  |
|------|----|---|-----------|-----------|-----------|--|
| 1    | 29 | 0 | 0.976777  | -0.041481 | -0.008059 |  |
| 2    | 35 | 0 | 3.345577  | 0.035516  | 0.025894  |  |
| 3    | 7  | 0 | -2.228638 | 2.266997  | -0.048696 |  |
| 4    | 7  | 0 | -3.303671 | 1.676322  | -0.052114 |  |
| 5    | 7  | 0 | -3.356678 | 0.174964  | -0.115077 |  |
| 6    | 6  | 0 | -0.874367 | -0.204191 | -0.025391 |  |
| 7    | 6  | 0 | -2.145685 | -0.617136 | -0.053100 |  |
| 8    | 6  | 0 | -2.411189 | -2.130374 | -0.099981 |  |
| 9    | 1  | 0 | -1.465085 | -2.675430 | -0.068880 |  |
| 10   | 1  | 0 | -2.936574 | -2.402763 | -1.026934 |  |
| 11   | 1  | 0 | -3.024909 | -2.458900 | 0.750710  |  |
| 12   | 6  | 0 | -4.678779 | -0.362106 | 0.223542  |  |
| 13   | 1  | 0 | -5.396753 | 0.445756  | 0.053797  |  |
| 14   | 1  | 0 | -4.951881 | -1.210967 | -0.417593 |  |
| 15   | 1  | 0 | -4.763507 | -0.682940 | 1.277143  |  |

| P  |    |   |           |           |           |  |
|----|----|---|-----------|-----------|-----------|--|
| 1  | 29 | 0 | -0.834307 | -0.251077 | -0.000025 |  |
| 2  | 35 | 0 | -3.192174 | 0.134456  | 0.000021  |  |
| 3  | 7  | 0 | 1.787050  | -1.675562 | -0.000001 |  |
| 4  | 7  | 0 | 3.114706  | -1.466694 | -0.000012 |  |
| 5  | 7  | 0 | 3.288792  | -0.071987 | -0.000037 |  |
| 6  | 6  | 0 | 1.074305  | -0.449659 | -0.000003 |  |
| 7  | 6  | 0 | 2.058471  | 0.561391  | -0.000017 |  |
| 8  | 6  | 0 | 1.911756  | 2.055210  | -0.000039 |  |
| 9  | 1  | 0 | 0.843668  | 2.294166  | 0.000026  |  |
| 10 | 1  | 0 | 2.364192  | 2.523116  | -0.888941 |  |
| 11 | 1  | 0 | 2.364313  | 2.523156  | 0.888782  |  |
| 12 | 6  | 0 | 4.631668  | 0.481914  | 0.000081  |  |
| 13 | 1  | 0 | 5.333482  | -0.356872 | -0.000053 |  |
| 14 | 1  | 0 | 4.812161  | 1.099289  | -0.891065 |  |
| 15 | 1  | 0 | 4.812141  | 1.098979  | 0.891448  |  |

Cu+C4DABCO+Br

|   |    |   |           |          |           |
|---|----|---|-----------|----------|-----------|
| 1 | 29 | 0 | -1.585356 | 0.011395 | -0.244379 |
| 2 | 35 | 0 | 0.007427  | 2.003064 | -0.137753 |

|    |    |   |            |           |           |
|----|----|---|------------|-----------|-----------|
| 3  | 35 | 0 | -0.007438  | -1.996487 | -0.150321 |
| 4  | 29 | 0 | 1.585346   | -0.003890 | -0.244373 |
| 5  | 7  | 0 | -3.627507  | 0.007631  | -0.264488 |
| 6  | 6  | 0 | -4.154390  | -1.229438 | 0.430554  |
| 7  | 6  | 0 | -4.146968  | 0.013051  | -1.686134 |
| 8  | 6  | 0 | -4.160567  | 1.235230  | 0.442543  |
| 9  | 6  | 0 | -5.701358  | -1.249316 | 0.460131  |
| 10 | 1  | 0 | -3.763663  | -2.098358 | -0.113810 |
| 11 | 1  | 0 | -3.752607  | -1.227266 | 1.451845  |
| 12 | 1  | 0 | -3.753490  | 0.914919  | -2.174282 |
| 13 | 1  | 0 | -3.748292  | -0.881567 | -2.183225 |
| 14 | 6  | 0 | -5.686548  | 0.008783  | -1.709194 |
| 15 | 6  | 0 | -5.707566  | 1.248214  | 0.470574  |
| 16 | 1  | 0 | -3.773134  | 2.111402  | -0.092642 |
| 17 | 1  | 0 | -3.759792  | 1.224412  | 1.464193  |
| 18 | 1  | 0 | -6.112398  | -2.114630 | -0.080091 |
| 19 | 1  | 0 | -6.078471  | -1.205005 | 1.489429  |
| 20 | 7  | 0 | -6.256679  | 0.001040  | -0.259275 |
| 21 | 1  | 0 | -6.090104  | 0.920384  | -2.174577 |
| 22 | 1  | 0 | -6.085139  | -0.900795 | -2.182583 |
| 23 | 1  | 0 | -6.121662  | 2.115848  | -0.063611 |
| 24 | 1  | 0 | -6.085738  | 1.194491  | 1.499014  |
| 25 | 6  | 0 | -7.815167  | -0.002685 | -0.351119 |
| 26 | 6  | 0 | -8.590815  | -0.009352 | 0.974915  |
| 27 | 1  | 0 | -8.058218  | -0.894044 | -0.943847 |
| 28 | 1  | 0 | -8.062810  | 0.891703  | -0.937386 |
| 29 | 6  | 0 | -10.118229 | -0.012812 | 0.703858  |
| 30 | 1  | 0 | -8.337117  | -0.893599 | 1.573236  |
| 31 | 1  | 0 | -8.342067  | 0.872387  | 1.578960  |
| 32 | 6  | 0 | -10.944127 | -0.018889 | 2.006862  |
| 33 | 1  | 0 | -10.384533 | 0.870905  | 0.104387  |
| 34 | 1  | 0 | -10.379642 | -0.894437 | 0.099192  |
| 35 | 1  | 0 | -12.020121 | -0.020886 | 1.792443  |
| 36 | 1  | 0 | -10.720901 | -0.907591 | 2.612323  |
| 37 | 1  | 0 | -10.725234 | 0.867155  | 2.617753  |
| 38 | 7  | 0 | 3.627500   | -0.003278 | -0.264468 |
| 39 | 6  | 0 | 4.156847   | 1.225944  | 0.442501  |
| 40 | 6  | 0 | 4.146931   | 0.004044  | -1.686117 |
| 41 | 6  | 0 | 4.158128   | -1.238733 | 0.430624  |
| 42 | 6  | 0 | 5.703893   | 1.242946  | 0.471499  |
| 43 | 1  | 0 | 3.767389   | 2.100886  | -0.093056 |
| 44 | 1  | 0 | 3.755559   | 1.214342  | 1.463935  |
| 45 | 1  | 0 | 3.751354   | -0.892021 | -2.183166 |
| 46 | 1  | 0 | 3.750332   | 0.904472  | -2.174305 |
| 47 | 6  | 0 | 5.686517   | 0.004996  | -1.709187 |
| 48 | 6  | 0 | 5.705059   | -1.254587 | 0.459203  |
| 49 | 1  | 0 | 3.769399   | -2.108885 | -0.113368 |
| 50 | 1  | 0 | 3.756901   | -1.237354 | 1.452141  |
| 51 | 1  | 0 | 6.116102   | 2.112343  | -0.061203 |
| 52 | 1  | 0 | 6.081497   | 1.188927  | 1.500149  |
| 53 | 7  | 0 | 6.256680   | -0.001903 | -0.259278 |
| 54 | 1  | 0 | 6.088077   | -0.903064 | -2.183098 |
| 55 | 1  | 0 | 6.087088   | 0.918118  | -2.174050 |
| 56 | 1  | 0 | 6.117964   | -2.118130 | -0.082501 |
| 57 | 1  | 0 | 6.082783   | -1.210568 | 1.488272  |
| 58 | 6  | 0 | 7.815171   | -0.000861 | -0.351134 |
| 59 | 6  | 0 | 8.590841   | -0.006338 | 0.974892  |
| 60 | 1  | 0 | 8.060221   | 0.894667  | -0.936720 |

Supplementary Material for PCCP  
 This journal is © The Owner Societies 2010

|    |   |   |           |           |           |
|----|---|---|-----------|-----------|-----------|
| 61 | 1 | 0 | 8.060796  | -0.891080 | -0.944542 |
| 62 | 6 | 0 | 10.118258 | -0.005240 | 0.703834  |
| 63 | 1 | 0 | 8.339601  | 0.874199  | 1.579672  |
| 64 | 1 | 0 | 8.339648  | -0.891788 | 1.572479  |
| 65 | 6 | 0 | 10.944171 | -0.010322 | 2.006832  |
| 66 | 1 | 0 | 10.382135 | -0.885528 | 0.098291  |
| 67 | 1 | 0 | 10.382090 | 0.879815  | 0.105245  |
| 68 | 1 | 0 | 12.020167 | -0.009306 | 1.792413  |
| 69 | 1 | 0 | 10.722965 | 0.874586  | 2.618539  |
| 70 | 1 | 0 | 10.723268 | -0.900159 | 2.611475  |

Cu+C4DABCO+2Br

|    |    |   |           |           |           |
|----|----|---|-----------|-----------|-----------|
| 1  | 29 | 0 | -2.572097 | 0.010242  | -0.207221 |
| 2  | 7  | 0 | -0.041063 | 0.018488  | -0.181637 |
| 3  | 6  | 0 | 0.576110  | 1.304366  | -0.572863 |
| 4  | 6  | 0 | 0.577258  | -1.102632 | -0.921917 |
| 5  | 6  | 0 | 0.087618  | -0.194282 | 1.279825  |
| 6  | 6  | 0 | 2.070311  | 1.338110  | -0.099712 |
| 7  | 1  | 0 | 0.511603  | 1.403196  | -1.660543 |
| 8  | 1  | 0 | -0.010137 | 2.119497  | -0.137076 |
| 9  | 1  | 0 | 0.101398  | -2.030856 | -0.592399 |
| 10 | 1  | 0 | 0.365475  | -0.986648 | -1.988596 |
| 11 | 6  | 0 | 2.128473  | -1.108132 | -0.678842 |
| 12 | 6  | 0 | 1.594196  | -0.381052 | 1.652324  |
| 13 | 1  | 0 | -0.496367 | -1.078289 | 1.552830  |
| 14 | 1  | 0 | -0.344930 | 0.671312  | 1.789500  |
| 15 | 1  | 0 | 2.758071  | 1.601525  | -0.906298 |
| 16 | 1  | 0 | 2.227836  | 2.021427  | 0.741639  |
| 17 | 7  | 0 | 2.462065  | -0.066841 | 0.409684  |
| 18 | 1  | 0 | 2.499583  | -2.074079 | -0.320203 |
| 19 | 1  | 0 | 2.686687  | -0.820847 | -1.573178 |
| 20 | 1  | 0 | 1.829498  | -1.411839 | 1.937018  |
| 21 | 1  | 0 | 1.923242  | 0.293361  | 2.449405  |
| 22 | 6  | 0 | 3.938978  | -0.123913 | 0.823020  |
| 23 | 6  | 0 | 4.973700  | 0.026574  | -0.304129 |
| 24 | 1  | 0 | 4.074634  | -1.086412 | 1.330829  |
| 25 | 1  | 0 | 4.073278  | 0.672167  | 1.565467  |
| 26 | 6  | 0 | 6.405694  | 0.043385  | 0.287187  |
| 27 | 1  | 0 | 4.897123  | -0.803184 | -1.018243 |
| 28 | 1  | 0 | 4.815623  | 0.957464  | -0.864046 |
| 29 | 6  | 0 | 7.484377  | 0.181703  | -0.806179 |
| 30 | 1  | 0 | 6.498025  | 0.876714  | 0.999787  |
| 31 | 1  | 0 | 6.578769  | -0.881129 | 0.858144  |
| 32 | 1  | 0 | 8.488199  | 0.194428  | -0.365249 |
| 33 | 1  | 0 | 7.441264  | -0.655089 | -1.515724 |
| 34 | 1  | 0 | 7.356653  | 1.112779  | -1.373960 |
| 35 | 35 | 0 | -2.762168 | 2.397494  | 0.008577  |
| 36 | 35 | 0 | -2.656461 | -2.396317 | -0.021385 |

4Cu+4Br (cubic)

|   |    |   |           |           |           |
|---|----|---|-----------|-----------|-----------|
| 1 | 29 | 0 | -0.927411 | 0.950336  | 1.064836  |
| 2 | 35 | 0 | 0.667012  | -0.561983 | 2.473122  |
| 3 | 35 | 0 | 0.453171  | 2.540584  | -0.471712 |
| 4 | 35 | 0 | -2.548780 | -0.515274 | -0.357358 |

|   |    |   |           |           |           |
|---|----|---|-----------|-----------|-----------|
| 5 | 29 | 0 | -0.431534 | 0.363887  | -1.605210 |
| 6 | 29 | 0 | -0.294193 | -1.648473 | 0.307054  |
| 7 | 29 | 0 | 1.654177  | 0.333565  | 0.233122  |
| 8 | 35 | 0 | 1.427736  | -1.462759 | -1.643888 |

4Cu+4Br (square)

|   |    |   |           |           |           |
|---|----|---|-----------|-----------|-----------|
| 1 | 29 | 0 | 1.540201  | 1.776547  | -0.017796 |
| 2 | 29 | 0 | 1.778933  | -1.538614 | 0.003480  |
| 3 | 29 | 0 | -1.539897 | -1.778806 | -0.000483 |
| 4 | 29 | 0 | -1.779023 | 1.539183  | 0.001886  |
| 5 | 35 | 0 | 0.242036  | -3.346281 | -0.208331 |
| 6 | 35 | 0 | 3.347472  | 0.242077  | 0.213034  |
| 7 | 35 | 0 | -0.241859 | 3.347276  | -0.200544 |
| 8 | 35 | 0 | -3.347827 | -0.241672 | 0.206540  |

4Cu+6Br (chair)

|    |    |   |           |           |           |
|----|----|---|-----------|-----------|-----------|
| 1  | 29 | 0 | -1.460710 | 0.464929  | 0.040236  |
| 2  | 35 | 0 | 0.649832  | 1.923032  | -0.140299 |
| 3  | 35 | 0 | -0.650198 | -1.921741 | 0.142981  |
| 4  | 35 | 0 | -3.742662 | 1.574817  | 0.121526  |
| 5  | 29 | 0 | -5.732526 | 0.248700  | 0.004567  |
| 6  | 29 | 0 | 1.460177  | -0.463729 | -0.038601 |
| 7  | 35 | 0 | 3.741929  | -1.574012 | -0.121848 |
| 8  | 29 | 0 | 5.732826  | -0.249398 | -0.005692 |
| 9  | 35 | 0 | -7.833500 | -0.816557 | -0.080471 |
| 10 | 35 | 0 | 7.834794  | 0.814045  | 0.077688  |

Cu+C4DABCO+N (CN) 2 (C)

|    |    |   |           |           |           |
|----|----|---|-----------|-----------|-----------|
| 1  | 29 | 0 | 2.389136  | 0.016209  | -0.032546 |
| 2  | 7  | 0 | 4.241322  | 0.198880  | -0.195360 |
| 3  | 6  | 0 | 4.789978  | 1.418265  | 0.001165  |
| 4  | 6  | 0 | 4.985047  | -0.885966 | -0.505806 |
| 5  | 7  | 0 | 5.170962  | 2.526755  | 0.193111  |
| 6  | 7  | 0 | 5.547362  | -1.895423 | -0.780165 |
| 7  | 7  | 0 | 0.424376  | -0.154219 | 0.150431  |
| 8  | 6  | 0 | -0.189969 | -0.600036 | -1.158295 |
| 9  | 6  | 0 | -0.172445 | 1.181027  | 0.539716  |
| 10 | 6  | 0 | 0.081472  | -1.168413 | 1.218883  |
| 11 | 6  | 0 | -1.703120 | -0.917953 | -0.962560 |
| 12 | 1  | 0 | -0.041029 | 0.198252  | -1.890022 |
| 13 | 1  | 0 | 0.339382  | -1.485640 | -1.517282 |
| 14 | 1  | 0 | 0.184227  | 1.431983  | 1.542097  |
| 15 | 1  | 0 | 0.194139  | 1.948104  | -0.146411 |
| 16 | 6  | 0 | -1.728786 | 1.111905  | 0.487319  |
| 17 | 6  | 0 | -1.449629 | -1.144860 | 1.501987  |
| 18 | 1  | 0 | 0.639055  | -0.931214 | 2.127766  |
| 19 | 1  | 0 | 0.409716  | -2.151556 | 0.871778  |
| 20 | 1  | 0 | -2.313072 | -0.464215 | -1.745119 |
| 21 | 1  | 0 | -1.901410 | -1.993376 | -0.944075 |
| 22 | 7  | 0 | -2.164630 | -0.356841 | 0.390006  |
| 23 | 1  | 0 | -2.187031 | 1.536977  | 1.384358  |
| 24 | 1  | 0 | -2.130349 | 1.628238  | -0.386410 |
| 25 | 1  | 0 | -1.687814 | -0.647216 | 2.446246  |



Supplementary Material for PCCP  
 This journal is © The Owner Societies 2010

|    |   |   |           |           |           |
|----|---|---|-----------|-----------|-----------|
| 26 | 1 | 0 | -1.875634 | -2.151441 | 1.522777  |
| 27 | 6 | 0 | -3.697934 | -0.514555 | 0.574241  |
| 28 | 6 | 0 | -4.581132 | 0.350975  | -0.337233 |
| 29 | 1 | 0 | -3.894306 | -0.282834 | 1.627643  |
| 30 | 1 | 0 | -3.905161 | -1.578866 | 0.411620  |
| 31 | 6 | 0 | -6.076747 | 0.012877  | -0.091520 |
| 32 | 1 | 0 | -4.429010 | 1.419180  | -0.136502 |
| 33 | 1 | 0 | -4.357584 | 0.175272  | -1.398262 |
| 34 | 6 | 0 | -7.011344 | 0.868009  | -0.971031 |
| 35 | 1 | 0 | -6.251072 | -1.053026 | -0.299243 |
| 36 | 1 | 0 | -6.321120 | 0.175522  | 0.968502  |
| 37 | 1 | 0 | -8.059516 | 0.614453  | -0.778186 |
| 38 | 1 | 0 | -6.885350 | 1.938890  | -0.765851 |
| 39 | 1 | 0 | -6.820098 | 0.700749  | -2.038937 |

Cu+C4DABCO+N (CN) 2 (T)

|    |    |   |           |           |           |
|----|----|---|-----------|-----------|-----------|
| 1  | 29 | 0 | 2.033867  | 0.069968  | 0.010313  |
| 2  | 7  | 0 | 0.071738  | 0.260956  | 0.006009  |
| 3  | 6  | 0 | -0.523827 | -0.411514 | 1.221948  |
| 4  | 6  | 0 | -0.506127 | -0.378701 | -1.236150 |
| 5  | 6  | 0 | -0.313240 | 1.722258  | 0.022604  |
| 6  | 6  | 0 | -2.047884 | -0.097771 | 1.320315  |
| 7  | 1  | 0 | -0.342264 | -1.485850 | 1.135766  |
| 8  | 1  | 0 | -0.004932 | -0.055670 | 2.114762  |
| 9  | 1  | 0 | -0.163302 | 0.193562  | -2.102086 |
| 10 | 1  | 0 | -0.109708 | -1.392288 | -1.329376 |
| 11 | 6  | 0 | -2.062765 | -0.414343 | -1.153031 |
| 12 | 6  | 0 | -1.849219 | 1.871413  | -0.188903 |
| 13 | 1  | 0 | 0.231636  | 2.242401  | -0.768287 |
| 14 | 1  | 0 | 0.002739  | 2.144863  | 0.979775  |
| 15 | 1  | 0 | -2.631602 | -0.998301 | 1.517598  |
| 16 | 1  | 0 | -2.270019 | 0.639700  | 2.097114  |
| 17 | 7  | 0 | -2.526179 | 0.500708  | -0.010864 |
| 18 | 1  | 0 | -2.530771 | -0.059919 | -2.075480 |
| 19 | 1  | 0 | -2.435668 | -1.416967 | -0.936038 |
| 20 | 1  | 0 | -2.095759 | 2.217296  | -1.196632 |
| 21 | 1  | 0 | -2.296352 | 2.558930  | 0.533922  |
| 22 | 6  | 0 | -4.065198 | 0.698406  | -0.019340 |
| 23 | 6  | 0 | -4.909946 | -0.584628 | -0.038152 |
| 24 | 1  | 0 | -4.280393 | 1.309315  | -0.903875 |
| 25 | 1  | 0 | -4.289648 | 1.293872  | 0.873550  |
| 26 | 6  | 0 | -6.418047 | -0.222645 | 0.037899  |
| 27 | 1  | 0 | -4.735758 | -1.157102 | -0.958071 |
| 28 | 1  | 0 | -4.668400 | -1.236862 | 0.812002  |
| 29 | 6  | 0 | -7.312343 | -1.478734 | 0.006155  |
| 30 | 1  | 0 | -6.613676 | 0.343713  | 0.960265  |
| 31 | 1  | 0 | -6.681303 | 0.435973  | -0.802678 |
| 32 | 1  | 0 | -8.370212 | -1.199609 | 0.062542  |
| 33 | 1  | 0 | -7.167992 | -2.049405 | -0.920180 |
| 34 | 1  | 0 | -7.098420 | -2.143431 | 0.853078  |
| 35 | 7  | 0 | 3.820425  | -0.109673 | 0.004093  |
| 36 | 6  | 0 | 5.026038  | -0.231187 | 0.001467  |
| 37 | 7  | 0 | 6.247195  | -0.355883 | -0.002734 |
| 38 | 6  | 0 | 7.528370  | -0.483697 | -0.004242 |
| 39 | 7  | 0 | 8.714648  | -0.602740 | -0.006528 |

Cu+C4DABCO+2N (CN) 2 (T)

|    |    |   |           |           |           |
|----|----|---|-----------|-----------|-----------|
| 1  | 6  | 0 | 0.449116  | 4.807273  | -0.151044 |
| 2  | 6  | 0 | -1.574864 | 3.618039  | -0.239937 |
| 3  | 29 | 0 | -2.886775 | 0.931347  | -0.106696 |
| 4  | 7  | 0 | -3.450457 | -0.817286 | 0.082976  |
| 5  | 6  | 0 | -3.773650 | -1.966028 | 0.185076  |
| 6  | 7  | 0 | -4.019510 | -3.210877 | 0.320790  |
| 7  | 6  | 0 | -5.000355 | -3.970929 | -0.127640 |
| 8  | 7  | 0 | -5.853885 | -4.716768 | -0.508278 |
| 9  | 7  | 0 | -0.082936 | 0.210186  | -0.008849 |
| 10 | 6  | 0 | 0.803680  | 0.902412  | -0.972060 |
| 11 | 6  | 0 | 0.034230  | -1.257878 | -0.157647 |
| 12 | 6  | 0 | 0.276075  | 0.610604  | 1.370996  |
| 13 | 6  | 0 | 2.261924  | 0.339247  | -0.858269 |
| 14 | 1  | 0 | 0.423013  | 0.772624  | -1.988540 |
| 15 | 1  | 0 | 0.808573  | 1.968336  | -0.736846 |
| 16 | 1  | 0 | -0.741006 | -1.745810 | 0.437247  |
| 17 | 1  | 0 | -0.142095 | -1.519129 | -1.205126 |
| 18 | 6  | 0 | 1.458085  | -1.729693 | 0.301746  |
| 19 | 6  | 0 | 1.806555  | 0.379730  | 1.601328  |
| 20 | 1  | 0 | -0.322866 | 0.021835  | 2.071824  |
| 21 | 1  | 0 | 0.028416  | 1.664609  | 1.519914  |
| 22 | 1  | 0 | 2.512892  | -0.334549 | -1.680626 |
| 23 | 1  | 0 | 3.012324  | 1.133519  | -0.802561 |
| 24 | 7  | 0 | 2.358934  | -0.484615 | 0.440405  |
| 25 | 1  | 0 | 1.442215  | -2.212403 | 1.283972  |
| 26 | 1  | 0 | 1.925249  | -2.405850 | -0.416940 |
| 27 | 1  | 0 | 2.023034  | -0.155027 | 2.530973  |
| 28 | 1  | 0 | 2.372503  | 1.316152  | 1.585527  |
| 29 | 6  | 0 | 3.811640  | -0.866474 | 0.768069  |
| 30 | 6  | 0 | 4.596404  | -1.577467 | -0.345834 |
| 31 | 1  | 0 | 3.760972  | -1.501840 | 1.660470  |
| 32 | 1  | 0 | 4.313259  | 0.068380  | 1.044867  |
| 33 | 6  | 0 | 6.016394  | -1.943970 | 0.154333  |
| 34 | 1  | 0 | 4.088231  | -2.497430 | -0.663948 |
| 35 | 1  | 0 | 4.692424  | -0.931798 | -1.227764 |
| 36 | 6  | 0 | 6.848319  | -2.652083 | -0.933820 |
| 37 | 1  | 0 | 6.538219  | -1.031504 | 0.479232  |
| 38 | 1  | 0 | 5.938492  | -2.595239 | 1.037629  |
| 39 | 1  | 0 | 7.848256  | -2.901330 | -0.559868 |
| 40 | 1  | 0 | 6.369188  | -3.586042 | -1.255230 |
| 41 | 1  | 0 | 6.972017  | -2.013479 | -1.818243 |
| 42 | 7  | 0 | -2.321710 | 2.684287  | -0.296801 |
| 43 | 7  | 0 | 1.632362  | 4.977597  | -0.157798 |
| 44 | 7  | 0 | -0.866819 | 4.688936  | -0.125809 |

Cu+C4DABCO+2N (CN) 2 (T+C)

|   |    |   |           |           |           |
|---|----|---|-----------|-----------|-----------|
| 1 | 6  | 0 | 1.653362  | 2.741052  | 0.187443  |
| 2 | 6  | 0 | 0.033408  | 4.491854  | -0.221545 |
| 3 | 29 | 0 | 3.468071  | 0.369984  | 0.086924  |
| 4 | 7  | 0 | -0.546062 | 5.467955  | -0.588817 |
| 5 | 7  | 0 | 2.594272  | 2.000459  | 0.228675  |
| 6 | 7  | 0 | 0.532189  | 3.361292  | 0.239222  |
| 7 | 7  | 0 | -0.022069 | -0.653109 | 0.633833  |
| 8 | 6  | 0 | -0.753019 | 0.358799  | 1.429316  |

Supplementary Material for PCCP  
This journal is © The Owner Societies 2010

|    |   |   |           |           |           |
|----|---|---|-----------|-----------|-----------|
| 9  | 6 | 0 | -0.649359 | -1.985958 | 0.782645  |
| 10 | 6 | 0 | -0.008909 | -0.278638 | -0.800941 |
| 11 | 6 | 0 | -2.277251 | 0.348257  | 1.050293  |
| 12 | 1 | 0 | -0.635439 | 0.136093  | 2.494068  |
| 13 | 1 | 0 | -0.328435 | 1.345743  | 1.234687  |
| 14 | 1 | 0 | -0.009246 | -2.729578 | 0.299933  |
| 15 | 1 | 0 | -0.716945 | -2.224411 | 1.848837  |
| 16 | 6 | 0 | -2.079819 | -1.976656 | 0.129947  |
| 17 | 6 | 0 | -1.469681 | -0.006119 | -1.287345 |
| 18 | 1 | 0 | 0.447750  | -1.101161 | -1.357378 |
| 19 | 1 | 0 | 0.599420  | 0.615061  | -0.944420 |
| 20 | 1 | 0 | -2.897878 | -0.097230 | 1.831527  |
| 21 | 1 | 0 | -2.655267 | 1.347869  | 0.815055  |
| 22 | 7 | 0 | -2.455990 | -0.519486 | -0.210714 |
| 23 | 1 | 0 | -2.106769 | -2.529758 | -0.814617 |
| 24 | 1 | 0 | -2.849448 | -2.371252 | 0.796975  |
| 25 | 1 | 0 | -1.711906 | -0.524390 | -2.220378 |
| 26 | 1 | 0 | -1.673032 | 1.062837  | -1.404675 |
| 27 | 6 | 0 | -3.879888 | -0.417546 | -0.775849 |
| 28 | 6 | 0 | -5.028423 | -0.740534 | 0.193458  |
| 29 | 1 | 0 | -3.910752 | -1.096764 | -1.636490 |
| 30 | 1 | 0 | -3.982061 | 0.608130  | -1.149780 |
| 31 | 6 | 0 | -6.386611 | -0.652576 | -0.547002 |
| 32 | 1 | 0 | -4.921729 | -1.750060 | 0.611988  |
| 33 | 1 | 0 | -5.041047 | -0.035163 | 1.033936  |
| 34 | 6 | 0 | -7.576987 | -0.966037 | 0.381672  |
| 35 | 1 | 0 | -6.508253 | 0.355216  | -0.970995 |
| 36 | 1 | 0 | -6.389063 | -1.354323 | -1.394572 |
| 37 | 1 | 0 | -8.525689 | -0.897650 | -0.163707 |
| 38 | 1 | 0 | -7.501679 | -1.980173 | 0.796017  |
| 39 | 1 | 0 | -7.623081 | -0.260356 | 1.221568  |
| 40 | 7 | 0 | 4.027864  | -1.440925 | -0.161028 |
| 41 | 6 | 0 | 5.310364  | -1.837772 | -0.034788 |
| 42 | 6 | 0 | 3.047694  | -2.299239 | -0.472529 |
| 43 | 7 | 0 | 6.460496  | -2.107282 | 0.094381  |
| 44 | 7 | 0 | 2.088899  | -2.954840 | -0.740839 |
